# Supplementary material for: Symptoms of anxiety and depression in relation to work patterns during the first wave of the COVID-19 epidemic in Philadelphia PA: a cross-sectional survey
Source: bioRxiv or medRxiv preprint supplement (doi:10.1101/2021.01.21.21250117), 2021-01-22
Supplement: Supplementary file [file media-2.pdf]

## The MEANS Procedure

Gender=Female

| Race       | N Obs | Variable | Label                 | N   | Mean       | Std Dev   | 5th Pctl  | 50th Pctl  | 95th Pctl  | Minimum | Maximum    |
|------------|-------|----------|-----------------------|-----|------------|-----------|-----------|------------|------------|---------|------------|
| white      | 551   | AscoreR  | HADS Anxiety score    | 551 | 10.2232305 | 3.9989868 | 4.0000000 | 10.0000000 | 17.0000000 | 0       | 21.0000000 |
|            |       | DscoreR  | HADS Depression score | 551 | 6.5154265  | 3.6535459 | 1.0000000 | 6.0000000  | 13.0000000 | 0       | 20.0000000 |
| black      | 63    | AscoreR  | HADS Anxiety score    | 63  | 9.2380952  | 4.9667095 | 0         | 9.0000000  | 19.0000000 | 0       | 20.0000000 |
|            |       | DscoreR  | HADS Depression score | 63  | 6.0000000  | 3.8100038 | 1.0000000 | 5.0000000  | 14.0000000 | 0       | 18.0000000 |
| other race | 49    | AscoreR  | HADS Anxiety score    | 49  | 9.3265306  | 4.3223631 | 2.0000000 | 9.0000000  | 16.0000000 | 0       | 20.0000000 |
|            |       | DscoreR  | HADS Depression score | 49  | 6.7346939  | 3.7736781 | 1.0000000 | 7.0000000  | 14.0000000 | 0       | 15.0000000 |

Gender=Male

| Race       | N Obs | Variable | Label                 | N   | Mean      | Std Dev   | 5th Pctl  | 50th Pctl | 95th Pctl  | Minimum   | Maximum    |
|------------|-------|----------|-----------------------|-----|-----------|-----------|-----------|-----------|------------|-----------|------------|
| white      | 205   | AscoreR  | HADS Anxiety score    | 205 | 8.6243902 | 4.1243407 | 2.0000000 | 8.0000000 | 16.0000000 | 0         | 20.0000000 |
|            |       | DscoreR  | HADS Depression score | 205 | 5.5463415 | 3.5012671 | 1.0000000 | 5.0000000 | 12.0000000 | 0         | 18.0000000 |
| black      | 10    | AscoreR  | HADS Anxiety score    | 10  | 6.0000000 | 5.1854497 | 1.0000000 | 4.0000000 | 16.0000000 | 1.0000000 | 16.0000000 |
|            |       | DscoreR  | HADS Depression score | 10  | 3.7000000 | 3.5605867 | 0         | 2.5000000 | 9.0000000  | 0         | 9.0000000  |
| other race | 19    | AscoreR  | HADS Anxiety score    | 19  | 8.0526316 | 3.8510271 | 1.0000000 | 8.0000000 | 17.0000000 | 1.0000000 | 17.0000000 |
|            |       | DscoreR  | HADS Depression score | 19  | 5.3157895 | 3.1278788 | 0         | 5.0000000 | 13.0000000 | 0         | 13.0000000 |

## The MEANS Procedure

Gender=Female

| Race       | N<br>Obs | Variable | Label                 | N   | Mean       | Std Dev   | 5th Pctl  | 50th Pctl  | 95th Pctl  | Minimum | Maximum    |
|------------|----------|----------|-----------------------|-----|------------|-----------|-----------|------------|------------|---------|------------|
| white      | 551      | AscoreR  | HADS Anxiety score    | 551 | 10.2232305 | 3.9989868 | 4.0000000 | 10.0000000 | 17.0000000 | 0       | 21.0000000 |
|            |          | DscoreR  | HADS Depression score | 551 | 6.5154265  | 3.6535459 | 1.0000000 | 6.0000000  | 13.0000000 | 0       | 20.0000000 |
| black      | 63       | AscoreR  | HADS Anxiety score    | 63  | 9.2380952  | 4.9667095 | 0         | 9.0000000  | 19.0000000 | 0       | 20.0000000 |
|            |          | DscoreR  | HADS Depression score | 63  | 6.0000000  | 3.8100038 | 1.0000000 | 5.0000000  | 14.0000000 | 0       | 18.0000000 |
| other race | 49       | AscoreR  | HADS Anxiety score    | 49  | 9.3265306  | 4.3223631 | 2.0000000 | 9.0000000  | 16.0000000 | 0       | 20.0000000 |
|            |          | DscoreR  | HADS Depression score | 49  | 6.7346939  | 3.7736781 | 1.0000000 | 7.0000000  | 14.0000000 | 0       | 15.0000000 |

Gender=Male

| Race       | N<br>Obs | Variable | Label                 | N   | Mean      | Std Dev   | 5th Pctl  | 50th Pctl | 95th Pctl  | Minimum   | Maximum    |
|------------|----------|----------|-----------------------|-----|-----------|-----------|-----------|-----------|------------|-----------|------------|
| white      | 205      | AscoreR  | HADS Anxiety score    | 205 | 8.6243902 | 4.1243407 | 2.0000000 | 8.0000000 | 16.0000000 | 0         | 20.0000000 |
|            |          | DscoreR  | HADS Depression score | 205 | 5.5463415 | 3.5012671 | 1.0000000 | 5.0000000 | 12.0000000 | 0         | 18.0000000 |
| black      | 10       | AscoreR  | HADS Anxiety score    | 10  | 6.0000000 | 5.1854497 | 1.0000000 | 4.0000000 | 16.0000000 | 1.0000000 | 16.0000000 |
|            |          | DscoreR  | HADS Depression score | 10  | 3.7000000 | 3.5605867 | 0         | 2.5000000 | 9.0000000  | 0         | 9.0000000  |
| other race | 19       | AscoreR  | HADS Anxiety score    | 19  | 8.0526316 | 3.8510271 | 1.0000000 | 8.0000000 | 17.0000000 | 1.0000000 | 17.0000000 |
|            |          | DscoreR  | HADS Depression score | 19  | 5.3157895 | 3.1278788 | 0         | 5.0000000 | 13.0000000 | 0         | 13.0000000 |

## The MEANS Procedure

Gender=Female

| Age             | N Obs | Variable | Label                 | N   | Mean       | Std Dev   | 5th Pctl  | 50th Pctl  | 95th Pctl  | Minimum | Maximum    |
|-----------------|-------|----------|-----------------------|-----|------------|-----------|-----------|------------|------------|---------|------------|
| less than 35    | 174   | AscoreR  | HADS Anxiety score    | 174 | 10.6321839 | 4.0619906 | 4.0000000 | 11.0000000 | 18.0000000 | 0       | 19.0000000 |
|                 |       | DscoreR  | HADS Depression score | 174 | 6.5689655  | 3.6148957 | 1.0000000 | 7.0000000  | 14.0000000 | 0       | 17.0000000 |
| 35-54           | 292   | AscoreR  | HADS Anxiety score    | 292 | 10.0958904 | 4.0288116 | 4.0000000 | 10.0000000 | 17.0000000 | 0       | 20.0000000 |
|                 |       | DscoreR  | HADS Depression score | 292 | 6.4315068  | 3.4420236 | 1.0000000 | 6.0000000  | 12.0000000 | 0       | 19.0000000 |
| greater than 55 | 197   | AscoreR  | HADS Anxiety score    | 197 | 9.5126904  | 4.2923866 | 2.0000000 | 9.0000000  | 17.0000000 | 0       | 21.0000000 |
|                 |       | DscoreR  | HADS Depression score | 197 | 6.4822335  | 4.0615091 | 0         | 6.0000000  | 14.0000000 | 0       | 20.0000000 |

Gender=Male

| Age             | N Obs | Variable | Label                 | N   | Mean       | Std Dev   | 5th Pctl  | 50th Pctl  | 95th Pctl  | Minimum   | Maximum    |
|-----------------|-------|----------|-----------------------|-----|------------|-----------|-----------|------------|------------|-----------|------------|
| less than 35    | 36    | AscoreR  | HADS Anxiety score    | 36  | 10.3333333 | 4.3556203 | 3.0000000 | 10.0000000 | 18.0000000 | 1.0000000 | 19.0000000 |
|                 |       | DscoreR  | HADS Depression score | 36  | 6.7777778  | 3.0247655 | 2.0000000 | 6.0000000  | 13.0000000 | 2.0000000 | 13.0000000 |
| 35-54           | 117   | AscoreR  | HADS Anxiety score    | 117 | 8.8461538  | 4.0292367 | 2.0000000 | 9.0000000  | 16.0000000 | 0         | 20.0000000 |
|                 |       | DscoreR  | HADS Depression score | 117 | 5.6410256  | 3.7288751 | 1.0000000 | 5.0000000  | 12.0000000 | 0         | 18.0000000 |
| greater than 55 | 81    | AscoreR  | HADS Anxiety score    | 81  | 7.0864198  | 3.8800694 | 1.0000000 | 7.0000000  | 14.0000000 | 0         | 17.0000000 |
|                 |       | DscoreR  | HADS Depression score | 81  | 4.5802469  | 3.0857098 | 1.0000000 | 4.0000000  | 9.0000000  | 0         | 16.0000000 |

## The MEANS Procedure

Gender=Female

| Personal income in 2019 | N Obs | Variable           | Label                 | N   | Mean       | Std Dev   | 5th Pctl  | 50th Pctl  | 95th Pctl  | Minimum   | Maximum    |
|-------------------------|-------|--------------------|-----------------------|-----|------------|-----------|-----------|------------|------------|-----------|------------|
| less than \$40,000      | 132   | AscoreR<br>DscoreR | HADS Anxiety score    | 132 | 10.9469697 | 4.0574395 | 5.0000000 | 11.0000000 | 18.0000000 | 0         | 20.0000000 |
|                         |       |                    | HADS Depression score | 132 | 7.1439394  | 3.5600253 | 2.0000000 | 7.0000000  | 14.0000000 | 0         | 17.0000000 |
| 40,000 - \$99,999       | 348   | AscoreR<br>DscoreR | HADS Anxiety score    | 348 | 10.0229885 | 4.1865078 | 4.0000000 | 10.0000000 | 17.0000000 | 0         | 21.0000000 |
|                         |       |                    | HADS Depression score | 348 | 6.2787356  | 3.7354763 | 1.0000000 | 6.0000000  | 13.0000000 | 0         | 20.0000000 |
| \$100,000 and above     | 172   | AscoreR<br>DscoreR | HADS Anxiety score    | 172 | 9.5988372  | 3.9107886 | 3.0000000 | 9.0000000  | 16.0000000 | 0         | 19.0000000 |
|                         |       |                    | HADS Depression score | 172 | 6.4302326  | 3.6145926 | 1.0000000 | 6.5000000  | 12.0000000 | 0         | 19.0000000 |
| missing                 | 11    | AscoreR<br>DscoreR | HADS Anxiety score    | 11  | 8.0000000  | 5.1380930 | 0         | 10.0000000 | 14.0000000 | 0         | 14.0000000 |
|                         |       |                    | HADS Depression score | 11  | 5.8181818  | 3.6005050 | 2.0000000 | 5.0000000  | 14.0000000 | 2.0000000 | 14.0000000 |

Gender=Male

| Personal income in 2019 | N Obs | Variable           | Label                 | N   | Mean      | Std Dev   | 5th Pctl  | 50th Pctl | 95th Pctl  | Minimum   | Maximum    |
|-------------------------|-------|--------------------|-----------------------|-----|-----------|-----------|-----------|-----------|------------|-----------|------------|
| less than \$40,000      | 34    | AscoreR<br>DscoreR | HADS Anxiety score    | 34  | 9.6470588 | 4.0368181 | 4.0000000 | 9.0000000 | 18.0000000 | 4.0000000 | 20.0000000 |
|                         |       |                    | HADS Depression score | 34  | 6.8235294 | 3.6966044 | 2.0000000 | 6.0000000 | 13.0000000 | 0         | 18.0000000 |
| 40,000 - \$99,999       | 96    | AscoreR<br>DscoreR | HADS Anxiety score    | 96  | 9.0520833 | 4.2286486 | 2.0000000 | 9.0000000 | 17.0000000 | 0         | 19.0000000 |
|                         |       |                    | HADS Depression score | 96  | 5.8333333 | 3.6293153 | 1.0000000 | 5.0000000 | 13.0000000 | 0         | 18.0000000 |
| \$100,000 and above     | 100   | AscoreR<br>DscoreR | HADS Anxiety score    | 100 | 7.4900000 | 4.0163680 | 1.0000000 | 7.0000000 | 14.0000000 | 0         | 18.0000000 |
|                         |       |                    | HADS Depression score | 100 | 4.5700000 | 3.0293347 | 1.0000000 | 4.0000000 | 9.0000000  | 0         | 15.0000000 |
| missing                 | 4     | AscoreR<br>DscoreR | HADS Anxiety score    | 4   | 8.7500000 | 3.5939764 | 4.0000000 | 9.5000000 | 12.0000000 | 4.0000000 | 12.0000000 |
|                         |       |                    | HADS Depression score | 4   | 6.5000000 | 4.2031734 | 2.0000000 | 6.0000000 | 12.0000000 | 2.0000000 | 12.0000000 |

## The MEANS Procedure

Gender=Female

| Education                | N Obs | Variable           | Label                                       | N   | Mean       | Std Dev   | 5th Pctl   | 50th Pctl  | 95th Pctl  | Minimum    | Maximum    |
|--------------------------|-------|--------------------|---------------------------------------------|-----|------------|-----------|------------|------------|------------|------------|------------|
| college degree or higher | 589   | AscoreR<br>DscoreR | HADS Anxiety score<br>HADS Depression score | 589 | 10.0237691 | 4.0761600 | 4.0000000  | 10.0000000 | 16.0000000 | 0          | 21.0000000 |
|                          |       |                    |                                             | 589 | 6.4108659  | 3.5791750 | 1.0000000  | 6.0000000  | 12.0000000 | 0          | 20.0000000 |
| no college degree        | 73    | AscoreR<br>DscoreR | HADS Anxiety score<br>HADS Depression score | 73  | 10.2465753 | 4.4621271 | 4.0000000  | 10.0000000 | 18.0000000 | 0          | 19.0000000 |
|                          |       |                    |                                             | 73  | 7.0136986  | 4.3700151 | 0          | 6.0000000  | 14.0000000 | 0          | 16.0000000 |
| missing                  | 1     | AscoreR<br>DscoreR | HADS Anxiety score<br>HADS Depression score | 1   | 20.0000000 | .         | 20.0000000 | 20.0000000 | 20.0000000 | 20.0000000 | 20.0000000 |
|                          |       |                    |                                             | 1   | 10.0000000 | .         | 10.0000000 | 10.0000000 | 10.0000000 | 10.0000000 | 10.0000000 |

Gender=Male

| Education                | N Obs | Variable           | Label                                       | N   | Mean      | Std Dev   | 5th Pctl  | 50th Pctl | 95th Pctl  | Minimum   | Maximum    |
|--------------------------|-------|--------------------|---------------------------------------------|-----|-----------|-----------|-----------|-----------|------------|-----------|------------|
| college degree or higher | 202   | AscoreR<br>DscoreR | HADS Anxiety score<br>HADS Depression score | 202 | 8.6237624 | 4.1124770 | 2.0000000 | 8.0000000 | 16.0000000 | 0         | 20.0000000 |
|                          |       |                    |                                             | 202 | 5.5396040 | 3.5226228 | 1.0000000 | 5.0000000 | 12.0000000 | 0         | 18.0000000 |
| no college degree        | 29    | AscoreR<br>DscoreR | HADS Anxiety score<br>HADS Depression score | 29  | 7.6896552 | 4.5677710 | 0         | 6.0000000 | 17.0000000 | 0         | 17.0000000 |
|                          |       |                    |                                             | 29  | 5.0689655 | 3.2615841 | 0         | 5.0000000 | 12.0000000 | 0         | 12.0000000 |
| missing                  | 3     | AscoreR<br>DscoreR | HADS Anxiety score<br>HADS Depression score | 3   | 5.3333333 | 2.5166115 | 3.0000000 | 5.0000000 | 8.0000000  | 3.0000000 | 8.0000000  |
|                          |       |                    |                                             | 3   | 3.0000000 | 2.0000000 | 1.0000000 | 3.0000000 | 5.0000000  | 1.0000000 | 5.0000000  |

## The MEANS Procedure

Gender=Female

| children < 18 years living in your household | N Obs | Variable | Label                 | N   | Mean       | Std Dev   | 5th Pctl  | 50th Pctl  | 95th Pctl  | Minimum   | Maximum    |
|----------------------------------------------|-------|----------|-----------------------|-----|------------|-----------|-----------|------------|------------|-----------|------------|
| no                                           | 494   | AscoreR  | HADS Anxiety score    | 494 | 10.1315789 | 4.1970837 | 4.0000000 | 10.0000000 | 17.0000000 | 0         | 21.0000000 |
|                                              |       | DscoreR  | HADS Depression score | 494 | 6.5364372  | 3.7651234 | 1.0000000 | 6.0000000  | 13.0000000 | 0         | 20.0000000 |
| yes                                          | 166   | AscoreR  | HADS Anxiety score    | 166 | 9.8734940  | 3.9591424 | 4.0000000 | 10.0000000 | 18.0000000 | 0         | 20.0000000 |
|                                              |       | DscoreR  | HADS Depression score | 166 | 6.3614458  | 3.4150409 | 1.0000000 | 6.0000000  | 12.0000000 | 0         | 18.0000000 |
| missing                                      | 3     | AscoreR  | HADS Anxiety score    | 3   | 9.3333333  | 3.5118846 | 6.0000000 | 9.0000000  | 13.0000000 | 6.0000000 | 13.0000000 |
|                                              |       | DscoreR  | HADS Depression score | 3   | 4.3333333  | 2.5166115 | 2.0000000 | 4.0000000  | 7.0000000  | 2.0000000 | 7.0000000  |

Gender=Male

| children < 18 years living in your household | N Obs | Variable | Label                 | N   | Mean      | Std Dev   | 5th Pctl  | 50th Pctl | 95th Pctl  | Minimum   | Maximum    |
|----------------------------------------------|-------|----------|-----------------------|-----|-----------|-----------|-----------|-----------|------------|-----------|------------|
| no                                           | 168   | AscoreR  | HADS Anxiety score    | 168 | 8.5714286 | 4.2434471 | 2.0000000 | 8.0000000 | 17.0000000 | 0         | 20.0000000 |
|                                              |       | DscoreR  | HADS Depression score | 168 | 5.4940476 | 3.5376453 | 1.0000000 | 5.0000000 | 12.0000000 | 0         | 18.0000000 |
| yes                                          | 62    | AscoreR  | HADS Anxiety score    | 62  | 8.3709677 | 3.9968589 | 2.0000000 | 8.5000000 | 14.0000000 | 0         | 17.0000000 |
|                                              |       | DscoreR  | HADS Depression score | 62  | 5.4354839 | 3.3857027 | 1.0000000 | 5.0000000 | 12.0000000 | 0         | 14.0000000 |
| missing                                      | 4     | AscoreR  | HADS Anxiety score    | 4   | 5.5000000 | 3.1091264 | 1.0000000 | 6.5000000 | 8.0000000  | 1.0000000 | 8.0000000  |
|                                              |       | DscoreR  | HADS Depression score | 4   | 3.7500000 | 2.7537853 | 1.0000000 | 3.5000000 | 7.0000000  | 1.0000000 | 7.0000000  |

## The MEANS Procedure

Gender=Female

| Marital status                  | N<br>Obs | Variable           | Label                                                | N          | Mean                    | Std Dev                | 5th Pctl               | 50th Pctl               | 95th Pctl                | Minimum                | Maximum                  |
|---------------------------------|----------|--------------------|------------------------------------------------------|------------|-------------------------|------------------------|------------------------|-------------------------|--------------------------|------------------------|--------------------------|
| married or living<br>as married | 381      | AscoreR<br>DscoreR | HADS Anxiety<br>score<br>HADS<br>Depression<br>score | 381<br>381 | 10.1732283<br>6.5774278 | 3.9571943<br>3.5164897 | 4.0000000<br>1.0000000 | 10.0000000<br>6.0000000 | 16.0000000<br>13.0000000 | 0<br>0                 | 21.0000000<br>18.0000000 |
| single                          | 212      | AscoreR<br>DscoreR | HADS Anxiety<br>score<br>HADS<br>Depression<br>score | 212<br>212 | 9.9811321<br>6.3443396  | 4.3789266<br>3.8820667 | 3.0000000<br>1.0000000 | 10.0000000<br>6.0000000 | 18.0000000<br>14.0000000 | 0<br>0                 | 21.0000000<br>20.0000000 |
| widowed,<br>divorced            | 67       | AscoreR<br>DscoreR | HADS Anxiety<br>score<br>HADS<br>Depression<br>score | 67<br>67   | 9.6716418<br>6.3134328  | 4.4017492<br>3.9589138 | 3.0000000<br>1.0000000 | 9.0000000<br>6.0000000  | 18.0000000<br>15.0000000 | 0<br>0                 | 19.0000000<br>18.0000000 |
| missing                         | 3        | AscoreR<br>DscoreR | HADS Anxiety<br>score<br>HADS<br>Depression<br>score | 3<br>3     | 10.6666667<br>8.0000000 | 2.5166115<br>2.6457513 | 8.0000000<br>5.0000000 | 11.0000000<br>9.0000000 | 13.0000000<br>10.0000000 | 8.0000000<br>5.0000000 | 13.0000000<br>10.0000000 |

Gender=Male

| Marital status                  | N<br>Obs | Variable           | Label                                                | N          | Mean                    | Std Dev                | 5th Pctl               | 50th Pctl              | 95th Pctl                | Minimum                | Maximum                  |
|---------------------------------|----------|--------------------|------------------------------------------------------|------------|-------------------------|------------------------|------------------------|------------------------|--------------------------|------------------------|--------------------------|
| married or living<br>as married | 152      | AscoreR<br>DscoreR | HADS Anxiety<br>score<br>HADS<br>Depression<br>score | 152<br>152 | 8.2697368<br>5.2500000  | 4.0214168<br>3.4817404 | 1.0000000<br>1.0000000 | 8.0000000<br>5.0000000 | 16.0000000<br>12.0000000 | 0<br>0                 | 18.0000000<br>18.0000000 |
| single                          | 64       | AscoreR<br>DscoreR | HADS Anxiety<br>score<br>HADS<br>Depression<br>score | 64<br>64   | 9.0468750<br>5.9531250  | 4.4665589<br>3.5296013 | 2.0000000<br>1.0000000 | 8.5000000<br>6.0000000 | 17.0000000<br>12.0000000 | 0<br>0                 | 19.0000000<br>18.0000000 |
| widowed,<br>divorced            | 15       | AscoreR<br>DscoreR | HADS Anxiety<br>score<br>HADS<br>Depression<br>score | 15<br>15   | 7.4000000<br>5.2666667  | 3.4392690<br>3.3051187 | 4.0000000<br>0         | 6.0000000<br>4.0000000 | 15.0000000<br>12.0000000 | 4.0000000<br>0         | 15.0000000<br>12.0000000 |
| missing                         | 3        | AscoreR<br>DscoreR | HADS Anxiety<br>score<br>HADS<br>Depression<br>score | 3<br>3     | 11.3333333<br>5.6666667 | 7.5718778<br>4.0414519 | 6.0000000<br>2.0000000 | 8.0000000<br>5.0000000 | 20.0000000<br>10.0000000 | 6.0000000<br>2.0000000 | 20.0000000<br>10.0000000 |

## The MEANS Procedure

Gender=Female

| Employment status at time of survey | N Obs | Variable | Label                 | N   | Mean       | Std Dev   | 5th Pctl  | 50th Pctl  | 95th Pctl  | Minimum   | Maximum    |
|-------------------------------------|-------|----------|-----------------------|-----|------------|-----------|-----------|------------|------------|-----------|------------|
| salaried                            | 433   | AscoreR  | HADS Anxiety score    | 433 | 10.0877598 | 4.0821044 | 4.0000000 | 10.0000000 | 17.0000000 | 0         | 21.0000000 |
|                                     |       | DscoreR  | HADS Depression score | 433 | 6.3256351  | 3.5943260 | 1.0000000 | 6.0000000  | 13.0000000 | 0         | 20.0000000 |
| hourly                              | 124   | AscoreR  | HADS Anxiety score    | 124 | 10.0080645 | 4.3101242 | 3.0000000 | 10.0000000 | 18.0000000 | 0         | 19.0000000 |
|                                     |       | DscoreR  | HADS Depression score | 124 | 6.8951613  | 4.0561477 | 1.0000000 | 7.0000000  | 14.0000000 | 0         | 18.0000000 |
| contractor                          | 67    | AscoreR  | HADS Anxiety score    | 67  | 10.2835821 | 4.2455180 | 4.0000000 | 9.0000000  | 19.0000000 | 3.0000000 | 20.0000000 |
|                                     |       | DscoreR  | HADS Depression score | 67  | 6.9701493  | 3.3027544 | 3.0000000 | 6.0000000  | 14.0000000 | 1.0000000 | 16.0000000 |
| other                               | 34    | AscoreR  | HADS Anxiety score    | 34  | 9.4411765  | 4.1792502 | 3.0000000 | 9.0000000  | 18.0000000 | 2.0000000 | 21.0000000 |
|                                     |       | DscoreR  | HADS Depression score | 34  | 5.7352941  | 3.7197982 | 0         | 6.0000000  | 14.0000000 | 0         | 14.0000000 |
| missing                             | 5     | AscoreR  | HADS Anxiety score    | 5   | 10.6000000 | 3.0495901 | 7.0000000 | 11.0000000 | 14.0000000 | 7.0000000 | 14.0000000 |
|                                     |       | DscoreR  | HADS Depression score | 5   | 8.4000000  | 4.3931765 | 4.0000000 | 7.0000000  | 14.0000000 | 4.0000000 | 14.0000000 |

Gender=Male

| Employment status at time of survey | N Obs | Variable | Label                 | N   | Mean      | Std Dev   | 5th Pctl  | 50th Pctl  | 95th Pctl  | Minimum   | Maximum    |
|-------------------------------------|-------|----------|-----------------------|-----|-----------|-----------|-----------|------------|------------|-----------|------------|
| salaried                            | 155   | AscoreR  | HADS Anxiety score    | 155 | 8.3870968 | 3.9843641 | 2.0000000 | 8.0000000  | 15.0000000 | 0         | 19.0000000 |
|                                     |       | DscoreR  | HADS Depression score | 155 | 5.1419355 | 3.2402475 | 1.0000000 | 5.0000000  | 12.0000000 | 0         | 18.0000000 |
| hourly                              | 36    | AscoreR  | HADS Anxiety score    | 36  | 9.0000000 | 4.9338481 | 1.0000000 | 8.0000000  | 17.0000000 | 0         | 20.0000000 |
|                                     |       | DscoreR  | HADS Depression score | 36  | 5.7777778 | 3.4151855 | 0         | 6.0000000  | 12.0000000 | 0         | 12.0000000 |
| contractor                          | 34    | AscoreR  | HADS Anxiety score    | 34  | 8.1176471 | 3.8906625 | 4.0000000 | 7.0000000  | 16.0000000 | 2.0000000 | 17.0000000 |
|                                     |       | DscoreR  | HADS Depression score | 34  | 6.3529412 | 4.3126477 | 0         | 5.0000000  | 16.0000000 | 0         | 18.0000000 |
| other                               | 9     | AscoreR  | HADS Anxiety score    | 9   | 9.0000000 | 5.4083269 | 1.0000000 | 10.0000000 | 18.0000000 | 1.0000000 | 18.0000000 |
|                                     |       | DscoreR  | HADS Depression score | 9   | 6.0000000 | 4.1231056 | 1.0000000 | 6.0000000  | 15.0000000 | 1.0000000 | 15.0000000 |



## The MEANS Procedure

Gender=Female

| worked 5+ days a week | N Obs | Variable | Label                 | N   | Mean       | Std Dev   | 5th Pctl  | 50th Pctl  | 95th Pctl  | Minimum | Maximum    |
|-----------------------|-------|----------|-----------------------|-----|------------|-----------|-----------|------------|------------|---------|------------|
| <5 days a week        | 166   | AscoreR  | HADS Anxiety score    | 166 | 9.6987952  | 4.2290050 | 3.0000000 | 9.0000000  | 16.0000000 | 0       | 21.0000000 |
|                       |       | DscoreR  | HADS Depression score | 166 | 6.5481928  | 3.8573931 | 1.0000000 | 6.0000000  | 14.0000000 | 0       | 20.0000000 |
| 5+ days a week        | 497   | AscoreR  | HADS Anxiety score    | 497 | 10.1851107 | 4.0968541 | 4.0000000 | 10.0000000 | 18.0000000 | 0       | 21.0000000 |
|                       |       | DscoreR  | HADS Depression score | 497 | 6.4607646  | 3.6165739 | 1.0000000 | 6.0000000  | 13.0000000 | 0       | 19.0000000 |

Gender=Male

| worked 5+ days a week | N Obs | Variable | Label                 | N   | Mean      | Std Dev   | 5th Pctl  | 50th Pctl | 95th Pctl  | Minimum   | Maximum    |
|-----------------------|-------|----------|-----------------------|-----|-----------|-----------|-----------|-----------|------------|-----------|------------|
| <5 days a week        | 44    | AscoreR  | HADS Anxiety score    | 44  | 7.7954545 | 3.6317690 | 2.0000000 | 8.0000000 | 13.0000000 | 0         | 18.0000000 |
|                       |       | DscoreR  | HADS Depression score | 44  | 5.5227273 | 3.5795845 | 1.0000000 | 5.0000000 | 12.0000000 | 1.0000000 | 17.0000000 |
| 5+ days a week        | 190   | AscoreR  | HADS Anxiety score    | 190 | 8.6210526 | 4.2766227 | 2.0000000 | 8.5000000 | 16.0000000 | 0         | 20.0000000 |
|                       |       | DscoreR  | HADS Depression score | 190 | 5.4315789 | 3.4676208 | 1.0000000 | 5.0000000 | 12.0000000 | 0         | 18.0000000 |

## The MEANS Procedure

Gender=Female

| Race       | N Obs | Variable | Label                 | N   | Mean       | Std Dev   | 5th Pctl  | 50th Pctl  | 95th Pctl  | Minimum | Maximum    |
|------------|-------|----------|-----------------------|-----|------------|-----------|-----------|------------|------------|---------|------------|
| white      | 551   | AscoreR  | HADS Anxiety score    | 551 | 10.2232305 | 3.9989868 | 4.0000000 | 10.0000000 | 17.0000000 | 0       | 21.0000000 |
|            |       | DscoreR  | HADS Depression score | 551 | 6.5154265  | 3.6535459 | 1.0000000 | 6.0000000  | 13.0000000 | 0       | 20.0000000 |
| black      | 63    | AscoreR  | HADS Anxiety score    | 63  | 9.2380952  | 4.9667095 | 0         | 9.0000000  | 19.0000000 | 0       | 20.0000000 |
|            |       | DscoreR  | HADS Depression score | 63  | 6.0000000  | 3.8100038 | 1.0000000 | 5.0000000  | 14.0000000 | 0       | 18.0000000 |
| other race | 49    | AscoreR  | HADS Anxiety score    | 49  | 9.3265306  | 4.3223631 | 2.0000000 | 9.0000000  | 16.0000000 | 0       | 20.0000000 |
|            |       | DscoreR  | HADS Depression score | 49  | 6.7346939  | 3.7736781 | 1.0000000 | 7.0000000  | 14.0000000 | 0       | 15.0000000 |

Gender=Male

| Race       | N Obs | Variable | Label                 | N   | Mean      | Std Dev   | 5th Pctl  | 50th Pctl | 95th Pctl  | Minimum   | Maximum    |
|------------|-------|----------|-----------------------|-----|-----------|-----------|-----------|-----------|------------|-----------|------------|
| white      | 205   | AscoreR  | HADS Anxiety score    | 205 | 8.6243902 | 4.1243407 | 2.0000000 | 8.0000000 | 16.0000000 | 0         | 20.0000000 |
|            |       | DscoreR  | HADS Depression score | 205 | 5.5463415 | 3.5012671 | 1.0000000 | 5.0000000 | 12.0000000 | 0         | 18.0000000 |
| black      | 10    | AscoreR  | HADS Anxiety score    | 10  | 6.0000000 | 5.1854497 | 1.0000000 | 4.0000000 | 16.0000000 | 1.0000000 | 16.0000000 |
|            |       | DscoreR  | HADS Depression score | 10  | 3.7000000 | 3.5605867 | 0         | 2.5000000 | 9.0000000  | 0         | 9.0000000  |
| other race | 19    | AscoreR  | HADS Anxiety score    | 19  | 8.0526316 | 3.8510271 | 1.0000000 | 8.0000000 | 17.0000000 | 1.0000000 | 17.0000000 |
|            |       | DscoreR  | HADS Depression score | 19  | 5.3157895 | 3.1278788 | 0         | 5.0000000 | 13.0000000 | 0         | 13.0000000 |

## The MEANS Procedure

Gender=Female

| worked 40+ hours a week | N Obs | Variable | Label                 | N   | Mean       | Std Dev   | 5th Pctl  | 50th Pctl  | 95th Pctl  | Minimum | Maximum    |
|-------------------------|-------|----------|-----------------------|-----|------------|-----------|-----------|------------|------------|---------|------------|
| <40 hrs a week          | 298   | AscoreR  | HADS Anxiety score    | 298 | 9.8959732  | 4.1502810 | 3.0000000 | 10.0000000 | 18.0000000 | 0       | 21.0000000 |
|                         |       | DscoreR  | HADS Depression score | 298 | 6.3791946  | 3.6909896 | 1.0000000 | 6.0000000  | 14.0000000 | 0       | 20.0000000 |
| 40+ hrs a week          | 365   | AscoreR  | HADS Anxiety score    | 365 | 10.2000000 | 4.1185722 | 4.0000000 | 10.0000000 | 17.0000000 | 0       | 21.0000000 |
|                         |       | DscoreR  | HADS Depression score | 365 | 6.5671233  | 3.6658528 | 1.0000000 | 7.0000000  | 13.0000000 | 0       | 18.0000000 |

Gender=Male

| worked 40+ hours a week | N Obs | Variable | Label                 | N   | Mean      | Std Dev   | 5th Pctl  | 50th Pctl | 95th Pctl  | Minimum | Maximum    |
|-------------------------|-------|----------|-----------------------|-----|-----------|-----------|-----------|-----------|------------|---------|------------|
| <40 hrs a week          | 80    | AscoreR  | HADS Anxiety score    | 80  | 8.1500000 | 4.2039764 | 2.0000000 | 7.0000000 | 16.0000000 | 0       | 19.0000000 |
|                         |       | DscoreR  | HADS Depression score | 80  | 5.4625000 | 3.5930444 | 1.0000000 | 5.0000000 | 12.0000000 | 0       | 18.0000000 |
| 40+ hrs a week          | 154   | AscoreR  | HADS Anxiety score    | 154 | 8.6298701 | 4.1538254 | 2.0000000 | 9.0000000 | 16.0000000 | 0       | 20.0000000 |
|                         |       | DscoreR  | HADS Depression score | 154 | 5.4415584 | 3.4337559 | 1.0000000 | 5.0000000 | 12.0000000 | 0       | 18.0000000 |

## The MEANS Procedure

Gender=Female

| Occupational one-on-one contact with known or suspected people with Covid-19 | N Obs | Variable | Label                 | N   | Mean       | Std Dev   | 5th Pctl  | 50th Pctl  | 95th Pctl  | Minimum   | Maximum    |
|------------------------------------------------------------------------------|-------|----------|-----------------------|-----|------------|-----------|-----------|------------|------------|-----------|------------|
| no                                                                           | 513   | AscoreR  | HADS Anxiety score    | 513 | 10.0721248 | 4.1936362 | 4.0000000 | 10.0000000 | 18.0000000 | 0         | 21.0000000 |
|                                                                              |       | DscoreR  | HADS Depression score | 513 | 6.5360624  | 3.7248067 | 1.0000000 | 6.0000000  | 13.0000000 | 0         | 20.0000000 |
| yes                                                                          | 48    | AscoreR  | HADS Anxiety score    | 48  | 9.8958333  | 4.7991115 | 1.0000000 | 9.0000000  | 19.0000000 | 0         | 20.0000000 |
|                                                                              |       | DscoreR  | HADS Depression score | 48  | 6.0000000  | 3.6727866 | 0         | 6.0000000  | 12.0000000 | 0         | 14.0000000 |
| do not know                                                                  | 102   | AscoreR  | HADS Anxiety score    | 102 | 10.0980392 | 3.4712676 | 5.0000000 | 10.0000000 | 16.0000000 | 3.0000000 | 18.0000000 |
|                                                                              |       | DscoreR  | HADS Depression score | 102 | 6.4411765  | 3.4370536 | 2.0000000 | 6.0000000  | 12.0000000 | 0         | 17.0000000 |

Gender=Male

| Occupational one-on-one contact with known or suspected people with Covid-19 | N Obs | Variable | Label                 | N   | Mean      | Std Dev   | 5th Pctl  | 50th Pctl | 95th Pctl  | Minimum   | Maximum    |
|------------------------------------------------------------------------------|-------|----------|-----------------------|-----|-----------|-----------|-----------|-----------|------------|-----------|------------|
| no                                                                           | 181   | AscoreR  | HADS Anxiety score    | 181 | 8.2154696 | 3.8228819 | 2.0000000 | 8.0000000 | 14.0000000 | 0         | 19.0000000 |
|                                                                              |       | DscoreR  | HADS Depression score | 181 | 5.4475138 | 3.3737149 | 1.0000000 | 5.0000000 | 12.0000000 | 0         | 18.0000000 |
| yes                                                                          | 20    | AscoreR  | HADS Anxiety score    | 20  | 8.8000000 | 4.8406176 | 1.0000000 | 8.0000000 | 17.0000000 | 1.0000000 | 17.0000000 |
|                                                                              |       | DscoreR  | HADS Depression score | 20  | 5.6000000 | 4.0183788 | 1.0000000 | 5.0000000 | 13.5000000 | 1.0000000 | 17.0000000 |
| do not know                                                                  | 33    | AscoreR  | HADS Anxiety score    | 33  | 9.6363636 | 5.3433263 | 0         | 9.0000000 | 18.0000000 | 0         | 20.0000000 |
|                                                                              |       | DscoreR  | HADS Depression score | 33  | 5.3636364 | 3.8227786 | 0         | 5.0000000 | 14.0000000 | 0         | 15.0000000 |

## The MEANS Procedure

Gender=Female

| Occupational one-on-one contact with known or suspected people with Covid-19 | N Obs | Variable | Label                 | N   | Mean       | Std Dev   | 5th Pctl  | 50th Pctl  | 95th Pctl  | Minimum   | Maximum    |
|------------------------------------------------------------------------------|-------|----------|-----------------------|-----|------------|-----------|-----------|------------|------------|-----------|------------|
| no                                                                           | 513   | AscoreR  | HADS Anxiety score    | 513 | 10.0721248 | 4.1936362 | 4.0000000 | 10.0000000 | 18.0000000 | 0         | 21.0000000 |
|                                                                              |       | DscoreR  | HADS Depression score | 513 | 6.5360624  | 3.7248067 | 1.0000000 | 6.0000000  | 13.0000000 | 0         | 20.0000000 |
| yes                                                                          | 48    | AscoreR  | HADS Anxiety score    | 48  | 9.8958333  | 4.7991115 | 1.0000000 | 9.0000000  | 19.0000000 | 0         | 20.0000000 |
|                                                                              |       | DscoreR  | HADS Depression score | 48  | 6.0000000  | 3.6727866 | 0         | 6.0000000  | 12.0000000 | 0         | 14.0000000 |
| do not know                                                                  | 102   | AscoreR  | HADS Anxiety score    | 102 | 10.0980392 | 3.4712676 | 5.0000000 | 10.0000000 | 16.0000000 | 3.0000000 | 18.0000000 |
|                                                                              |       | DscoreR  | HADS Depression score | 102 | 6.4411765  | 3.4370536 | 2.0000000 | 6.0000000  | 12.0000000 | 0         | 17.0000000 |

Gender=Male

| Occupational one-on-one contact with known or suspected people with Covid-19 | N Obs | Variable | Label                 | N   | Mean      | Std Dev   | 5th Pctl  | 50th Pctl | 95th Pctl  | Minimum   | Maximum    |
|------------------------------------------------------------------------------|-------|----------|-----------------------|-----|-----------|-----------|-----------|-----------|------------|-----------|------------|
| no                                                                           | 181   | AscoreR  | HADS Anxiety score    | 181 | 8.2154696 | 3.8228819 | 2.0000000 | 8.0000000 | 14.0000000 | 0         | 19.0000000 |
|                                                                              |       | DscoreR  | HADS Depression score | 181 | 5.4475138 | 3.3737149 | 1.0000000 | 5.0000000 | 12.0000000 | 0         | 18.0000000 |
| yes                                                                          | 20    | AscoreR  | HADS Anxiety score    | 20  | 8.8000000 | 4.8406176 | 1.0000000 | 8.0000000 | 17.0000000 | 1.0000000 | 17.0000000 |
|                                                                              |       | DscoreR  | HADS Depression score | 20  | 5.6000000 | 4.0183788 | 1.0000000 | 5.0000000 | 13.5000000 | 1.0000000 | 17.0000000 |
| do not know                                                                  | 33    | AscoreR  | HADS Anxiety score    | 33  | 9.6363636 | 5.3433263 | 0         | 9.0000000 | 18.0000000 | 0         | 20.0000000 |
|                                                                              |       | DscoreR  | HADS Depression score | 33  | 5.3636364 | 3.8227786 | 0         | 5.0000000 | 14.0000000 | 0         | 15.0000000 |

## The MEANS Procedure

Gender=Female

| Job designated as essential or life-sustaining | N Obs | Variable           | Label                                       | N   | Mean       | Std Dev   | 5th Pctl  | 50th Pctl  | 95th Pctl  | Minimum | Maximum    |
|------------------------------------------------|-------|--------------------|---------------------------------------------|-----|------------|-----------|-----------|------------|------------|---------|------------|
| no                                             | 485   | AscoreR<br>DscoreR | HADS Anxiety score<br>HADS Depression score | 485 | 10.0824742 | 4.1187690 | 4.0000000 | 10.0000000 | 18.0000000 | 0       | 21.0000000 |
|                                                |       |                    |                                             | 485 | 6.5237113  | 3.6491189 | 1.0000000 | 6.0000000  | 13.0000000 | 0       | 19.0000000 |
| yes                                            | 126   | AscoreR<br>DscoreR | HADS Anxiety score<br>HADS Depression score | 126 | 9.8412698  | 4.1654055 | 4.0000000 | 9.0000000  | 16.0000000 | 0       | 20.0000000 |
|                                                |       |                    |                                             | 126 | 6.1507937  | 3.7225098 | 1.0000000 | 6.0000000  | 12.0000000 | 0       | 18.0000000 |
| maybe                                          | 52    | AscoreR<br>DscoreR | HADS Anxiety score<br>HADS Depression score | 52  | 10.4230769 | 4.2303579 | 5.0000000 | 10.0000000 | 18.0000000 | 0       | 21.0000000 |
|                                                |       |                    |                                             | 52  | 6.9038462  | 3.8156521 | 1.0000000 | 7.0000000  | 13.0000000 | 0       | 20.0000000 |

Gender=Male

| Job designated as essential or life-sustaining | N Obs | Variable           | Label                                       | N   | Mean      | Std Dev   | 5th Pctl  | 50th Pctl  | 95th Pctl  | Minimum   | Maximum    |
|------------------------------------------------|-------|--------------------|---------------------------------------------|-----|-----------|-----------|-----------|------------|------------|-----------|------------|
| no                                             | 151   | AscoreR<br>DscoreR | HADS Anxiety score<br>HADS Depression score | 151 | 8.4039735 | 3.8870362 | 2.0000000 | 8.0000000  | 14.0000000 | 0         | 19.0000000 |
|                                                |       |                    |                                             | 151 | 5.4966887 | 3.4464942 | 1.0000000 | 5.0000000  | 12.0000000 | 0         | 18.0000000 |
| yes                                            | 70    | AscoreR<br>DscoreR | HADS Anxiety score<br>HADS Depression score | 70  | 8.3857143 | 4.6758487 | 1.0000000 | 8.0000000  | 17.0000000 | 0         | 20.0000000 |
|                                                |       |                    |                                             | 70  | 5.1857143 | 3.6407232 | 0         | 5.0000000  | 12.0000000 | 0         | 17.0000000 |
| maybe                                          | 13    | AscoreR<br>DscoreR | HADS Anxiety score<br>HADS Depression score | 13  | 9.6153846 | 4.6104675 | 1.0000000 | 10.0000000 | 17.0000000 | 1.0000000 | 17.0000000 |
|                                                |       |                    |                                             | 13  | 6.3076923 | 3.0655238 | 2.0000000 | 6.0000000  | 11.0000000 | 2.0000000 | 11.0000000 |

## The MEANS Procedure

Gender=Female

| Used PPE at work | N Obs | Variable | Label                 | N   | Mean       | Std Dev   | 5th Pctl  | 50th Pctl  | 95th Pctl  | Minimum   | Maximum    |
|------------------|-------|----------|-----------------------|-----|------------|-----------|-----------|------------|------------|-----------|------------|
| no               | 378   | AscoreR  | HADS Anxiety score    | 378 | 10.2592593 | 4.1664928 | 4.0000000 | 10.0000000 | 18.0000000 | 0         | 21.0000000 |
|                  |       | DscoreR  | HADS Depression score | 378 | 6.7671958  | 3.7648075 | 1.0000000 | 7.0000000  | 14.0000000 | 0         | 20.0000000 |
| yes              | 183   | AscoreR  | HADS Anxiety score    | 183 | 9.6393443  | 4.3829068 | 2.0000000 | 9.0000000  | 17.0000000 | 0         | 20.0000000 |
|                  |       | DscoreR  | HADS Depression score | 183 | 5.9180328  | 3.5686136 | 0         | 6.0000000  | 12.0000000 | 0         | 18.0000000 |
| missing          | 102   | AscoreR  | HADS Anxiety score    | 102 | 10.0980392 | 3.4712676 | 5.0000000 | 10.0000000 | 16.0000000 | 3.0000000 | 18.0000000 |
|                  |       | DscoreR  | HADS Depression score | 102 | 6.4411765  | 3.4370536 | 2.0000000 | 6.0000000  | 12.0000000 | 0         | 17.0000000 |

Gender=Male

| Used PPE at work | N Obs | Variable | Label                 | N   | Mean      | Std Dev   | 5th Pctl  | 50th Pctl | 95th Pctl  | Minimum   | Maximum    |
|------------------|-------|----------|-----------------------|-----|-----------|-----------|-----------|-----------|------------|-----------|------------|
| no               | 134   | AscoreR  | HADS Anxiety score    | 134 | 8.1567164 | 3.6683046 | 2.0000000 | 8.0000000 | 14.0000000 | 1.0000000 | 18.0000000 |
|                  |       | DscoreR  | HADS Depression score | 134 | 5.5746269 | 3.4714233 | 1.0000000 | 5.0000000 | 12.0000000 | 0         | 18.0000000 |
| yes              | 67    | AscoreR  | HADS Anxiety score    | 67  | 8.5074627 | 4.4154451 | 1.0000000 | 8.0000000 | 17.0000000 | 0         | 19.0000000 |
|                  |       | DscoreR  | HADS Depression score | 67  | 5.2388060 | 3.3669047 | 1.0000000 | 5.0000000 | 12.0000000 | 0         | 14.0000000 |
| missing          | 33    | AscoreR  | HADS Anxiety score    | 33  | 9.6363636 | 5.3433263 | 0         | 9.0000000 | 18.0000000 | 0         | 20.0000000 |
|                  |       | DscoreR  | HADS Depression score | 33  | 5.3636364 | 3.8227786 | 0         | 5.0000000 | 14.0000000 | 0         | 15.0000000 |

## The MEANS Procedure

Gender=Female

| Period unable to work due to high risk of spreading of COVID-19 | N Obs | Variable | Label                 | N   | Mean       | Std Dev   | 5th Pctl  | 50th Pctl  | 95th Pctl  | Minimum | Maximum    |
|-----------------------------------------------------------------|-------|----------|-----------------------|-----|------------|-----------|-----------|------------|------------|---------|------------|
| no                                                              | 587   | AscoreR  | HADS Anxiety score    | 587 | 10.0477002 | 4.0970864 | 4.0000000 | 10.0000000 | 18.0000000 | 0       | 21.0000000 |
|                                                                 |       | DscoreR  | HADS Depression score | 587 | 6.4190801  | 3.6992081 | 1.0000000 | 6.0000000  | 13.0000000 | 0       | 20.0000000 |
| yes                                                             | 76    | AscoreR  | HADS Anxiety score    | 76  | 10.1842105 | 4.4233035 | 1.0000000 | 10.0000000 | 16.0000000 | 0       | 20.0000000 |
|                                                                 |       | DscoreR  | HADS Depression score | 76  | 6.9736842  | 3.4716900 | 1.0000000 | 7.0000000  | 14.0000000 | 0       | 15.0000000 |

Gender=Male

| Period unable to work due to high risk of spreading of COVID-19 | N Obs | Variable | Label                 | N   | Mean      | Std Dev   | 5th Pctl  | 50th Pctl | 95th Pctl  | Minimum   | Maximum    |
|-----------------------------------------------------------------|-------|----------|-----------------------|-----|-----------|-----------|-----------|-----------|------------|-----------|------------|
| no                                                              | 212   | AscoreR  | HADS Anxiety score    | 212 | 8.4575472 | 4.1171344 | 2.0000000 | 8.0000000 | 16.0000000 | 0         | 20.0000000 |
|                                                                 |       | DscoreR  | HADS Depression score | 212 | 5.3584906 | 3.3717215 | 1.0000000 | 5.0000000 | 12.0000000 | 0         | 18.0000000 |
| yes                                                             | 22    | AscoreR  | HADS Anxiety score    | 22  | 8.5454545 | 4.7381659 | 1.0000000 | 8.0000000 | 16.0000000 | 1.0000000 | 17.0000000 |
|                                                                 |       | DscoreR  | HADS Depression score | 22  | 6.3181818 | 4.4011510 | 2.0000000 | 5.5000000 | 16.0000000 | 1.0000000 | 18.0000000 |



## The MEANS Procedure

Gender=Female

| Period<br>unable<br>to work<br>due to<br>other<br>reasons | N<br>Obs | Variable | Label                 | N   | Mean       | Std Dev   | 5th Pctl  | 50th Pctl  | 95th Pctl  | Minimum | Maximum    |
|-----------------------------------------------------------|----------|----------|-----------------------|-----|------------|-----------|-----------|------------|------------|---------|------------|
| no                                                        | 527      | AscoreR  | HADS Anxiety score    | 527 | 10.1214421 | 4.2274289 | 4.0000000 | 10.0000000 | 18.0000000 | 0       | 21.0000000 |
|                                                           |          | DscoreR  | HADS Depression score | 527 | 6.5540797  | 3.7356083 | 1.0000000 | 6.0000000  | 13.0000000 | 0       | 20.0000000 |
| yes                                                       | 136      | AscoreR  | HADS Anxiety score    | 136 | 9.8382353  | 3.7480278 | 4.0000000 | 9.5000000  | 16.0000000 | 0       | 19.0000000 |
|                                                           |          | DscoreR  | HADS Depression score | 136 | 6.2058824  | 3.4321306 | 1.0000000 | 6.0000000  | 12.0000000 | 0       | 18.0000000 |

Gender=Male

| Period<br>unable<br>to work<br>due to<br>other<br>reasons | N<br>Obs | Variable | Label                 | N   | Mean      | Std Dev   | 5th Pctl  | 50th Pctl | 95th Pctl  | Minimum   | Maximum    |
|-----------------------------------------------------------|----------|----------|-----------------------|-----|-----------|-----------|-----------|-----------|------------|-----------|------------|
| no                                                        | 193      | AscoreR  | HADS Anxiety score    | 193 | 8.3989637 | 4.1447003 | 2.0000000 | 8.0000000 | 16.0000000 | 0         | 20.0000000 |
|                                                           |          | DscoreR  | HADS Depression score | 193 | 5.4663212 | 3.5178348 | 1.0000000 | 5.0000000 | 12.0000000 | 0         | 18.0000000 |
| yes                                                       | 40       | AscoreR  | HADS Anxiety score    | 40  | 8.8500000 | 4.3474130 | 2.0000000 | 9.0000000 | 17.5000000 | 0         | 18.0000000 |
|                                                           |          | DscoreR  | HADS Depression score | 40  | 5.3000000 | 3.3604029 | 1.0000000 | 5.0000000 | 11.0000000 | 1.0000000 | 18.0000000 |
| 3                                                         | 1        | AscoreR  | HADS Anxiety score    | 1   | 6.0000000 | .         | 6.0000000 | 6.0000000 | 6.0000000  | 6.0000000 | 6.0000000  |
|                                                           |          | DscoreR  | HADS Depression score | 1   | 8.0000000 | .         | 8.0000000 | 8.0000000 | 8.0000000  | 8.0000000 | 8.0000000  |

## The MEANS Procedure

Gender=Female

| access to paid sick leave or disability insurance through work | N Obs | Variable | Label                 | N   | Mean       | Std Dev   | 5th Pctl  | 50th Pctl  | 95th Pctl  | Minimum   | Maximum    |
|----------------------------------------------------------------|-------|----------|-----------------------|-----|------------|-----------|-----------|------------|------------|-----------|------------|
| no                                                             | 133   | AscoreR  | HADS Anxiety score    | 133 | 9.7142857  | 4.2561389 | 3.0000000 | 9.0000000  | 17.0000000 | 0         | 20.0000000 |
|                                                                |       | DscoreR  | HADS Depression score | 133 | 6.7443609  | 3.5879726 | 1.0000000 | 6.0000000  | 14.0000000 | 0         | 16.0000000 |
| yes                                                            | 510   | AscoreR  | HADS Anxiety score    | 510 | 10.1274510 | 4.0227046 | 4.0000000 | 10.0000000 | 17.0000000 | 0         | 21.0000000 |
|                                                                |       | DscoreR  | HADS Depression score | 510 | 6.3901961  | 3.6891363 | 1.0000000 | 6.0000000  | 13.0000000 | 0         | 20.0000000 |
| unsure                                                         | 20    | AscoreR  | HADS Anxiety score    | 20  | 10.7500000 | 5.8478516 | 0         | 11.0000000 | 19.5000000 | 0         | 20.0000000 |
|                                                                |       | DscoreR  | HADS Depression score | 20  | 7.1000000  | 3.9456839 | 1.0000000 | 7.0000000  | 13.0000000 | 1.0000000 | 13.0000000 |

Gender=Male

| access to paid sick leave or disability insurance through work | N Obs | Variable | Label                 | N   | Mean      | Std Dev   | 5th Pctl  | 50th Pctl | 95th Pctl  | Minimum   | Maximum    |
|----------------------------------------------------------------|-------|----------|-----------------------|-----|-----------|-----------|-----------|-----------|------------|-----------|------------|
| no                                                             | 57    | AscoreR  | HADS Anxiety score    | 57  | 8.3508772 | 4.0773382 | 2.0000000 | 7.0000000 | 16.0000000 | 1.0000000 | 18.0000000 |
|                                                                |       | DscoreR  | HADS Depression score | 57  | 6.5614035 | 4.4642130 | 1.0000000 | 6.0000000 | 17.0000000 | 0         | 18.0000000 |
| yes                                                            | 172   | AscoreR  | HADS Anxiety score    | 172 | 8.4709302 | 4.2197355 | 2.0000000 | 8.0000000 | 17.0000000 | 0         | 20.0000000 |
|                                                                |       | DscoreR  | HADS Depression score | 172 | 5.0813953 | 3.0386020 | 1.0000000 | 5.0000000 | 11.0000000 | 0         | 14.0000000 |
| unsure                                                         | 5     | AscoreR  | HADS Anxiety score    | 5   | 9.6000000 | 4.0373258 | 5.0000000 | 9.0000000 | 16.0000000 | 5.0000000 | 16.0000000 |
|                                                                |       | DscoreR  | HADS Depression score | 5   | 5.4000000 | 2.9664794 | 2.0000000 | 4.0000000 | 9.0000000  | 2.0000000 | 9.0000000  |

## The MEANS Procedure

Gender=Female

| Occupation                                                      | N Obs | Variable           | Label                                                   | N        | Mean                    | Std Dev                | 5th Pctl               | 50th Pctl               | 95th Pctl                | Minimum                | Maximum                  |
|-----------------------------------------------------------------|-------|--------------------|---------------------------------------------------------|----------|-------------------------|------------------------|------------------------|-------------------------|--------------------------|------------------------|--------------------------|
| accountants, financial specialists, and other business operatio | 33    | AscoreR<br>DscoreR | HADS<br>Anxiety<br>score<br>HADS<br>Depression<br>score | 33<br>33 | 9.2727273<br>6.2424242  | 3.7605911<br>2.8942864 | 3.0000000<br>2.0000000 | 8.0000000<br>7.0000000  | 15.0000000<br>11.0000000 | 1.0000000<br>2.0000000 | 18.0000000<br>14.0000000 |
| adminstrative support                                           | 81    | AscoreR<br>DscoreR | HADS<br>Anxiety<br>score<br>HADS<br>Depression<br>score | 81<br>81 | 9.4938272<br>6.0617284  | 4.3391343<br>4.0010801 | 3.0000000<br>1.0000000 | 9.0000000<br>5.0000000  | 17.0000000<br>13.0000000 | 1.0000000<br>0         | 21.0000000<br>20.0000000 |
| architects and engineers                                        | 10    | AscoreR<br>DscoreR | HADS<br>Anxiety<br>score<br>HADS<br>Depression<br>score | 10<br>10 | 9.3000000<br>7.4000000  | 3.8600518<br>3.0983867 | 4.0000000<br>3.0000000 | 8.5000000<br>7.5000000  | 15.0000000<br>12.0000000 | 4.0000000<br>3.0000000 | 15.0000000<br>12.0000000 |
| artists and performers                                          | 19    | AscoreR<br>DscoreR | HADS<br>Anxiety<br>score<br>HADS<br>Depression<br>score | 19<br>19 | 11.1052632<br>8.0000000 | 4.0400046<br>3.8873013 | 5.0000000<br>1.0000000 | 11.0000000<br>8.0000000 | 20.0000000<br>16.0000000 | 5.0000000<br>1.0000000 | 20.0000000<br>16.0000000 |
| computer occupations                                            | 17    | AscoreR<br>DscoreR | HADS<br>Anxiety<br>score<br>HADS<br>Depression<br>score | 17<br>17 | 10.4705882<br>5.8235294 | 4.7581200<br>3.8767785 | 0<br>0                 | 11.0000000<br>7.0000000 | 18.0000000<br>13.0000000 | 0<br>0                 | 18.0000000<br>13.0000000 |
| counselors, social workers, and community service occupations   | 32    | AscoreR<br>DscoreR | HADS<br>Anxiety<br>score<br>HADS<br>Depression<br>score | 32<br>32 | 9.8437500<br>6.2812500  | 3.8697285<br>3.1339388 | 4.0000000<br>2.0000000 | 9.0000000<br>6.0000000  | 15.0000000<br>11.0000000 | 1.0000000<br>0         | 19.0000000<br>14.0000000 |
| healthcare practitioners and technicians                        | 55    | AscoreR<br>DscoreR | HADS<br>Anxiety<br>score<br>HADS<br>Depression<br>score | 55<br>55 | 9.6363636<br>6.4727273  | 4.3306130<br>3.8483019 | 3.0000000<br>1.0000000 | 9.0000000<br>6.0000000  | 16.0000000<br>12.0000000 | 0<br>0                 | 20.0000000<br>17.0000000 |
| lawyers and other legal occupations                             | 28    | AscoreR<br>DscoreR | HADS<br>Anxiety<br>score<br>HADS<br>Depression<br>score | 28<br>28 | 9.3928571<br>5.1785714  | 3.9472380<br>2.9445942 | 3.0000000<br>1.0000000 | 9.0000000<br>5.0000000  | 16.0000000<br>10.0000000 | 1.0000000<br>0         | 18.0000000<br>10.0000000 |
| librarians and curators                                         | 16    | AscoreR<br>DscoreR | HADS<br>Anxiety<br>score<br>HADS<br>Depression<br>score | 16<br>16 | 10.3750000<br>7.0000000 | 3.7036019<br>3.6514837 | 5.0000000<br>0         | 10.0000000<br>6.5000000 | 17.0000000<br>14.0000000 | 5.0000000<br>0         | 17.0000000<br>14.0000000 |

## The MEANS Procedure

Gender=Female

| Occupation                                    | N<br>Obs | Variable | Label                                           | N   | Mean       | Std Dev   | 5th Pctl  | 50th Pctl  | 95th Pctl  | Minimum   | Maximum    |
|-----------------------------------------------|----------|----------|-------------------------------------------------|-----|------------|-----------|-----------|------------|------------|-----------|------------|
| life, physical, and<br>social scientists      | 57       | AscoreR  | HADS                                            | 57  | 9.6491228  | 3.7772402 | 3.0000000 | 9.0000000  | 16.0000000 | 0         | 18.0000000 |
|                                               |          | DscoreR  | Anxiety<br>score<br>HADS<br>Depression<br>score | 57  | 5.5964912  | 3.8352670 | 0         | 5.0000000  | 12.0000000 | 0         | 19.0000000 |
| managers                                      | 115      | AscoreR  | HADS                                            | 115 | 10.9304348 | 4.0969003 | 5.0000000 | 11.0000000 | 18.0000000 | 0         | 21.0000000 |
|                                               |          | DscoreR  | Anxiety<br>score<br>HADS<br>Depression<br>score | 115 | 6.8260870  | 3.2960925 | 1.0000000 | 7.0000000  | 12.0000000 | 0         | 14.0000000 |
| media and<br>communication                    | 27       | AscoreR  | HADS                                            | 27  | 10.0370370 | 3.7156786 | 5.0000000 | 10.0000000 | 15.0000000 | 4.0000000 | 17.0000000 |
|                                               |          | DscoreR  | Anxiety<br>score<br>HADS<br>Depression<br>score | 27  | 6.3703704  | 3.6810131 | 1.0000000 | 6.0000000  | 14.0000000 | 1.0000000 | 15.0000000 |
| missing                                       | 33       | AscoreR  | HADS                                            | 33  | 9.4242424  | 4.5759583 | 0         | 9.0000000  | 18.0000000 | 0         | 19.0000000 |
|                                               |          | DscoreR  | Anxiety<br>score<br>HADS<br>Depression<br>score | 33  | 6.7575758  | 4.5554247 | 1.0000000 | 7.0000000  | 16.0000000 | 0         | 18.0000000 |
| other blue collar                             | 33       | AscoreR  | HADS                                            | 33  | 10.2121212 | 4.0755182 | 4.0000000 | 9.0000000  | 18.0000000 | 3.0000000 | 19.0000000 |
|                                               |          | DscoreR  | Anxiety<br>score<br>HADS<br>Depression<br>score | 33  | 7.3030303  | 3.9881453 | 0         | 7.0000000  | 15.0000000 | 0         | 15.0000000 |
| retail and other sales<br>related occupations | 17       | AscoreR  | HADS                                            | 17  | 11.5882353 | 2.5509514 | 7.0000000 | 12.0000000 | 15.0000000 | 7.0000000 | 15.0000000 |
|                                               |          | DscoreR  | Anxiety<br>score<br>HADS<br>Depression<br>score | 17  | 7.8823529  | 4.1515412 | 3.0000000 | 7.0000000  | 18.0000000 | 3.0000000 | 18.0000000 |
| teachers                                      | 90       | AscoreR  | HADS                                            | 90  | 10.2000000 | 4.5250861 | 0         | 10.5000000 | 18.0000000 | 0         | 20.0000000 |
|                                               |          | DscoreR  | Anxiety<br>score<br>HADS<br>Depression<br>score | 90  | 6.5333333  | 3.5921262 | 1.0000000 | 6.0000000  | 12.0000000 | 0         | 18.0000000 |

## The MEANS Procedure

Gender=Male

| Occupation                                                      | N Obs | Variable           | Label                                                   | N        | Mean                    | Std Dev                | 5th Pctl               | 50th Pctl               | 95th Pctl                | Minimum                | Maximum                  |
|-----------------------------------------------------------------|-------|--------------------|---------------------------------------------------------|----------|-------------------------|------------------------|------------------------|-------------------------|--------------------------|------------------------|--------------------------|
| accountants, financial specialists, and other business operatio | 13    | AscoreR<br>DscoreR | HADS<br>Anxiety<br>score<br>HADS<br>Depression<br>score | 13<br>13 | 6.9230769<br>4.3846154  | 4.1122082<br>2.6937725 | 1.0000000<br>1.0000000 | 6.0000000<br>4.0000000  | 16.0000000<br>9.0000000  | 1.0000000<br>1.0000000 | 16.0000000<br>9.0000000  |
| adminstrative support                                           | 15    | AscoreR<br>DscoreR | HADS<br>Anxiety<br>score<br>HADS<br>Depression<br>score | 15<br>15 | 8.6666667<br>5.7333333  | 3.6968455<br>2.9146592 | 1.0000000<br>1.0000000 | 10.0000000<br>5.0000000 | 13.0000000<br>10.0000000 | 1.0000000<br>1.0000000 | 13.0000000<br>10.0000000 |
| architects and engineers                                        | 15    | AscoreR<br>DscoreR | HADS<br>Anxiety<br>score<br>HADS<br>Depression<br>score | 15<br>15 | 7.7333333<br>4.9333333  | 3.4323392<br>2.7115274 | 1.0000000<br>2.0000000 | 8.0000000<br>4.0000000  | 14.0000000<br>12.0000000 | 1.0000000<br>2.0000000 | 14.0000000<br>12.0000000 |
| artists and performers                                          | 8     | AscoreR<br>DscoreR | HADS<br>Anxiety<br>score<br>HADS<br>Depression<br>score | 8<br>8   | 11.0000000<br>7.6250000 | 5.2915026<br>3.9618719 | 2.0000000<br>0         | 11.5000000<br>7.5000000 | 18.0000000<br>12.0000000 | 2.0000000<br>0         | 18.0000000<br>12.0000000 |
| computer occupations                                            | 14    | AscoreR<br>DscoreR | HADS<br>Anxiety<br>score<br>HADS<br>Depression<br>score | 14<br>14 | 7.3571429<br>4.3571429  | 4.3607893<br>2.2738359 | 1.0000000<br>1.0000000 | 7.0000000<br>4.5000000  | 15.0000000<br>8.0000000  | 1.0000000<br>1.0000000 | 15.0000000<br>8.0000000  |
| counselors, social workers, and community service occupations   | 6     | AscoreR<br>DscoreR | HADS<br>Anxiety<br>score<br>HADS<br>Depression<br>score | 6<br>6   | 10.5000000<br>5.0000000 | 6.3166447<br>4.0000000 | 2.0000000<br>1.0000000 | 10.0000000<br>4.0000000 | 18.0000000<br>11.0000000 | 2.0000000<br>1.0000000 | 18.0000000<br>11.0000000 |
| healthcare practitioners and technicians                        | 19    | AscoreR<br>DscoreR | HADS<br>Anxiety<br>score<br>HADS<br>Depression<br>score | 19<br>19 | 9.4210526<br>6.1052632  | 4.3373800<br>4.3191400 | 4.0000000<br>1.0000000 | 8.0000000<br>6.0000000  | 20.0000000<br>17.0000000 | 4.0000000<br>1.0000000 | 20.0000000<br>17.0000000 |
| lawyers and other legal occupations                             | 9     | AscoreR<br>DscoreR | HADS<br>Anxiety<br>score<br>HADS<br>Depression<br>score | 9<br>9   | 10.5555556<br>6.4444444 | 4.1866189<br>3.3208098 | 5.0000000<br>2.0000000 | 10.0000000<br>6.0000000 | 19.0000000<br>13.0000000 | 5.0000000<br>2.0000000 | 19.0000000<br>13.0000000 |
| librarians and curators                                         | 2     | AscoreR<br>DscoreR | HADS<br>Anxiety<br>score<br>HADS<br>Depression<br>score | 2<br>2   | 10.0000000<br>6.5000000 | 1.4142136<br>0.7071068 | 9.0000000<br>6.0000000 | 10.0000000<br>6.5000000 | 11.0000000<br>7.0000000  | 9.0000000<br>6.0000000 | 11.0000000<br>7.0000000  |

## The MEANS Procedure

Gender=Male

| Occupation                                 | N Obs | Variable           | Label                                                   | N        | Mean                    | Std Dev                | 5th Pctl               | 50th Pctl               | 95th Pctl                | Minimum                | Maximum                  |
|--------------------------------------------|-------|--------------------|---------------------------------------------------------|----------|-------------------------|------------------------|------------------------|-------------------------|--------------------------|------------------------|--------------------------|
| life, physical, and social scientists      | 21    | AscoreR<br>DscoreR | HADS<br>Anxiety<br>score<br>HADS<br>Depression<br>score | 21<br>21 | 10.0952381<br>5.8095238 | 4.1941002<br>2.9600515 | 4.0000000<br>1.0000000 | 10.0000000<br>5.0000000 | 16.0000000<br>10.0000000 | 1.0000000<br>0         | 18.0000000<br>11.0000000 |
| managers                                   | 47    | AscoreR<br>DscoreR | HADS<br>Anxiety<br>score<br>HADS<br>Depression<br>score | 47<br>47 | 8.1063830<br>5.0425532  | 4.0337384<br>3.4132571 | 2.0000000<br>1.0000000 | 8.0000000<br>5.0000000  | 16.0000000<br>12.0000000 | 0<br>0                 | 17.0000000<br>15.0000000 |
| media and communication                    | 4     | AscoreR<br>DscoreR | HADS<br>Anxiety<br>score<br>HADS<br>Depression<br>score | 4<br>4   | 6.7500000<br>6.7500000  | 4.3493295<br>7.5443135 | 3.0000000<br>2.0000000 | 5.5000000<br>3.5000000  | 13.0000000<br>18.0000000 | 3.0000000<br>2.0000000 | 13.0000000<br>18.0000000 |
| missing                                    | 10    | AscoreR<br>DscoreR | HADS<br>Anxiety<br>score<br>HADS<br>Depression<br>score | 10<br>10 | 9.4000000<br>4.7000000  | 2.9888682<br>2.7507575 | 4.0000000<br>0         | 9.5000000<br>4.0000000  | 14.0000000<br>9.0000000  | 4.0000000<br>0         | 14.0000000<br>9.0000000  |
| other blue collar                          | 19    | AscoreR<br>DscoreR | HADS<br>Anxiety<br>score<br>HADS<br>Depression<br>score | 19<br>19 | 8.4210526<br>5.5263158  | 5.0806363<br>2.9882812 | 0<br>0                 | 8.0000000<br>5.0000000  | 17.0000000<br>12.0000000 | 0<br>0                 | 17.0000000<br>12.0000000 |
| retail and other sales related occupations | 7     | AscoreR<br>DscoreR | HADS<br>Anxiety<br>score<br>HADS<br>Depression<br>score | 7<br>7   | 7.0000000<br>7.2857143  | 2.6457513<br>5.2824958 | 4.0000000<br>2.0000000 | 6.0000000<br>7.0000000  | 12.0000000<br>18.0000000 | 4.0000000<br>2.0000000 | 12.0000000<br>18.0000000 |
| teachers                                   | 25    | AscoreR<br>DscoreR | HADS<br>Anxiety<br>score<br>HADS<br>Depression<br>score | 25<br>25 | 6.9600000<br>5.2000000  | 3.3724373<br>4.1432676 | 1.0000000<br>1.0000000 | 8.0000000<br>4.0000000  | 11.0000000<br>13.0000000 | 0<br>0                 | 11.0000000<br>16.0000000 |

## The MEANS Procedure

Gender=Female

| Industry                          | N<br>Obs | Variable           | Label                                                   | N          | Mean                    | Std Dev                | 5th Pctl               | 50th Pctl               | 95th Pctl                | Minimum                | Maximum                  |
|-----------------------------------|----------|--------------------|---------------------------------------------------------|------------|-------------------------|------------------------|------------------------|-------------------------|--------------------------|------------------------|--------------------------|
| accommodation or<br>food services | 14       | AscoreR<br>DscoreR | HADS<br>Anxiety<br>score<br>HADS<br>Depression<br>score | 14<br>14   | 8.2857143<br>6.5000000  | 4.6810349<br>4.5191899 | 0<br>0                 | 8.0000000<br>5.5000000  | 16.0000000<br>15.0000000 | 0<br>0                 | 16.0000000<br>15.0000000 |
| arts and<br>entertainment         | 21       | AscoreR<br>DscoreR | HADS<br>Anxiety<br>score<br>HADS<br>Depression<br>score | 21<br>21   | 10.7142857<br>7.0000000 | 3.6213652<br>2.6457513 | 5.0000000<br>3.0000000 | 11.0000000<br>7.0000000 | 16.0000000<br>11.0000000 | 3.0000000<br>3.0000000 | 16.0000000<br>12.0000000 |
| childcare                         | 13       | AscoreR<br>DscoreR | HADS<br>Anxiety<br>score<br>HADS<br>Depression<br>score | 13<br>13   | 10.4615385<br>6.8461538 | 5.7679486<br>3.7825510 | 0<br>1.0000000         | 11.0000000<br>7.0000000 | 19.0000000<br>12.0000000 | 0<br>1.0000000         | 19.0000000<br>12.0000000 |
| construction or<br>utilities      | 11       | AscoreR<br>DscoreR | HADS<br>Anxiety<br>score<br>HADS<br>Depression<br>score | 11<br>11   | 9.0909091<br>8.2727273  | 3.7270510<br>3.4667249 | 4.0000000<br>3.0000000 | 8.0000000<br>9.0000000  | 15.0000000<br>13.0000000 | 4.0000000<br>3.0000000 | 15.0000000<br>13.0000000 |
| education                         | 76       | AscoreR<br>DscoreR | HADS<br>Anxiety<br>score<br>HADS<br>Depression<br>score | 76<br>76   | 10.6184211<br>6.7631579 | 4.3816804<br>3.8327307 | 3.0000000<br>1.0000000 | 11.0000000<br>6.0000000 | 19.0000000<br>13.0000000 | 0<br>0                 | 20.0000000<br>18.0000000 |
| finance or insurance              | 30       | AscoreR<br>DscoreR | HADS<br>Anxiety<br>score<br>HADS<br>Depression<br>score | 30<br>30   | 10.4666667<br>8.3666667 | 4.4001045<br>4.3745607 | 3.0000000<br>1.0000000 | 10.0000000<br>8.0000000 | 18.0000000<br>16.0000000 | 1.0000000<br>1.0000000 | 19.0000000<br>18.0000000 |
| government                        | 27       | AscoreR<br>DscoreR | HADS<br>Anxiety<br>score<br>HADS<br>Depression<br>score | 27<br>27   | 10.2592593<br>5.9259259 | 4.3287287<br>3.4854194 | 4.0000000<br>2.0000000 | 10.0000000<br>5.0000000 | 16.0000000<br>12.0000000 | 0<br>0                 | 16.0000000<br>14.0000000 |
| healthcare                        | 107      | AscoreR<br>DscoreR | HADS<br>Anxiety<br>score<br>HADS<br>Depression<br>score | 107<br>107 | 10.0186916<br>6.3084112 | 4.0608144<br>3.6352862 | 4.0000000<br>1.0000000 | 10.0000000<br>6.0000000 | 17.0000000<br>12.0000000 | 0<br>0                 | 21.0000000<br>20.0000000 |
| higher education                  | 116      | AscoreR<br>DscoreR | HADS<br>Anxiety<br>score<br>HADS<br>Depression<br>score | 116<br>116 | 9.8620690<br>6.0172414  | 3.7944961<br>3.4690752 | 5.0000000<br>1.0000000 | 10.0000000<br>6.0000000 | 17.0000000<br>12.0000000 | 0<br>0                 | 20.0000000<br>16.0000000 |

## The MEANS Procedure

Gender=Female

| Industry                                                                | N Obs | Variable           | Label                                                   | N        | Mean                    | Std Dev                | 5th Pctl               | 50th Pctl               | 95th Pctl                | Minimum                | Maximum                  |
|-------------------------------------------------------------------------|-------|--------------------|---------------------------------------------------------|----------|-------------------------|------------------------|------------------------|-------------------------|--------------------------|------------------------|--------------------------|
| legal services                                                          | 32    | AscoreR<br>DscoreR | HADS<br>Anxiety<br>score<br>HADS<br>Depression<br>score | 32<br>32 | 9.9375000<br>5.6562500  | 3.9426330<br>2.8916942 | 3.0000000<br>1.0000000 | 10.0000000<br>5.5000000 | 16.0000000<br>10.0000000 | 1.0000000<br>0         | 18.0000000<br>10.0000000 |
| manufacturing                                                           | 9     | AscoreR<br>DscoreR | HADS<br>Anxiety<br>score<br>HADS<br>Depression<br>score | 9<br>9   | 9.6666667<br>5.0000000  | 3.0413813<br>3.3911650 | 6.0000000<br>2.0000000 | 9.0000000<br>4.0000000  | 15.0000000<br>10.0000000 | 6.0000000<br>2.0000000 | 15.0000000<br>10.0000000 |
| missing                                                                 | 26    | AscoreR<br>DscoreR | HADS<br>Anxiety<br>score<br>HADS<br>Depression<br>score | 26<br>26 | 9.3846154<br>7.0000000  | 3.9301595<br>2.4657656 | 5.0000000<br>2.0000000 | 9.0000000<br>7.0000000  | 16.0000000<br>11.0000000 | 0<br>2.0000000         | 21.0000000<br>12.0000000 |
| personal services or<br>repair or other<br>support services             | 11    | AscoreR<br>DscoreR | HADS<br>Anxiety<br>score<br>HADS<br>Depression<br>score | 11<br>11 | 12.7272727<br>9.0909091 | 3.1013194<br>3.1130225 | 8.0000000<br>6.0000000 | 14.0000000<br>8.0000000 | 16.0000000<br>15.0000000 | 8.0000000<br>6.0000000 | 16.0000000<br>15.0000000 |
| pharmaceutical                                                          | 8     | AscoreR<br>DscoreR | HADS<br>Anxiety<br>score<br>HADS<br>Depression<br>score | 8<br>8   | 9.1250000<br>5.0000000  | 3.7961447<br>3.4226139 | 5.0000000<br>1.0000000 | 8.5000000<br>4.0000000  | 15.0000000<br>12.0000000 | 5.0000000<br>1.0000000 | 15.0000000<br>12.0000000 |
| professional or<br>scientific or<br>engineering or<br>computer services | 36    | AscoreR<br>DscoreR | HADS<br>Anxiety<br>score<br>HADS<br>Depression<br>score | 36<br>36 | 10.0833333<br>5.8888889 | 4.2586047<br>3.7552080 | 4.0000000<br>1.0000000 | 10.0000000<br>6.0000000 | 18.0000000<br>16.0000000 | 2.0000000<br>1.0000000 | 18.0000000<br>17.0000000 |
| publishing or media<br>or other information<br>services                 | 23    | AscoreR<br>DscoreR | HADS<br>Anxiety<br>score<br>HADS<br>Depression<br>score | 23<br>23 | 10.0869565<br>6.9130435 | 3.5279796<br>3.8602054 | 5.0000000<br>2.0000000 | 9.0000000<br>6.0000000  | 15.0000000<br>14.0000000 | 2.0000000<br>0         | 15.0000000<br>15.0000000 |
| real estate                                                             | 6     | AscoreR<br>DscoreR | HADS<br>Anxiety<br>score<br>HADS<br>Depression<br>score | 6<br>6   | 8.5000000<br>4.3333333  | 4.0865633<br>2.5819889 | 5.0000000<br>0         | 7.0000000<br>5.0000000  | 15.0000000<br>7.0000000  | 5.0000000<br>0         | 15.0000000<br>7.0000000  |
| religious or<br>grantmaking or civic<br>or labor organizations          | 32    | AscoreR<br>DscoreR | HADS<br>Anxiety<br>score<br>HADS<br>Depression<br>score | 32<br>32 | 9.0937500<br>5.5312500  | 5.1076121<br>3.3599575 | 1.0000000<br>1.0000000 | 8.0000000<br>5.0000000  | 18.0000000<br>13.0000000 | 0<br>0                 | 19.0000000<br>14.0000000 |



## The MEANS Procedure

Gender=Female

| Industry           | N Obs | Variable | Label                 | N  | Mean       | Std Dev   | 5th Pctl  | 50th Pctl  | 95th Pctl  | Minimum   | Maximum    |
|--------------------|-------|----------|-----------------------|----|------------|-----------|-----------|------------|------------|-----------|------------|
| retail             | 18    | AscoreR  | HADS Anxiety score    | 18 | 12.6111111 | 2.6377104 | 7.0000000 | 12.5000000 | 19.0000000 | 7.0000000 | 19.0000000 |
|                    |       | DscoreR  | HADS Depression score | 18 | 7.8888889  | 3.0271106 | 3.0000000 | 7.5000000  | 14.0000000 | 3.0000000 | 14.0000000 |
| social services    | 26    | AscoreR  | HADS Anxiety score    | 26 | 9.9615385  | 4.5911286 | 1.0000000 | 9.0000000  | 18.0000000 | 0         | 19.0000000 |
|                    |       | DscoreR  | HADS Depression score | 26 | 6.6153846  | 4.0306518 | 1.0000000 | 7.0000000  | 14.0000000 | 0         | 14.0000000 |
| telecommunications | 11    | AscoreR  | HADS Anxiety score    | 11 | 10.6363636 | 4.9854333 | 2.0000000 | 10.0000000 | 19.0000000 | 2.0000000 | 19.0000000 |
|                    |       | DscoreR  | HADS Depression score | 11 | 9.0000000  | 4.9598387 | 1.0000000 | 8.0000000  | 19.0000000 | 1.0000000 | 19.0000000 |
| transportation     | 8     | AscoreR  | HADS Anxiety score    | 8  | 7.6250000  | 3.3354160 | 4.0000000 | 7.0000000  | 13.0000000 | 4.0000000 | 13.0000000 |
|                    |       | DscoreR  | HADS Depression score | 8  | 4.8750000  | 5.8660646 | 0         | 3.5000000  | 18.0000000 | 0         | 18.0000000 |
| wholesale          | 2     | AscoreR  | HADS Anxiety score    | 2  | 9.0000000  | 1.4142136 | 8.0000000 | 9.0000000  | 10.0000000 | 8.0000000 | 10.0000000 |
|                    |       | DscoreR  | HADS Depression score | 2  | 4.0000000  | 2.8284271 | 2.0000000 | 4.0000000  | 6.0000000  | 2.0000000 | 6.0000000  |

Gender=Male

| Industry                       | N Obs | Variable | Label                 | N  | Mean       | Std Dev   | 5th Pctl  | 50th Pctl  | 95th Pctl  | Minimum   | Maximum    |
|--------------------------------|-------|----------|-----------------------|----|------------|-----------|-----------|------------|------------|-----------|------------|
| accommodation or food services | 8     | AscoreR  | HADS Anxiety score    | 8  | 10.1250000 | 3.6815175 | 6.0000000 | 9.0000000  | 17.0000000 | 6.0000000 | 17.0000000 |
|                                |       | DscoreR  | HADS Depression score | 8  | 7.0000000  | 4.8107024 | 3.0000000 | 6.0000000  | 18.0000000 | 3.0000000 | 18.0000000 |
| arts and entertainment         | 10    | AscoreR  | HADS Anxiety score    | 10 | 10.3000000 | 3.7133393 | 6.0000000 | 11.0000000 | 18.0000000 | 6.0000000 | 18.0000000 |
|                                |       | DscoreR  | HADS Depression score | 10 | 8.8000000  | 4.3410188 | 3.0000000 | 9.5000000  | 16.0000000 | 3.0000000 | 16.0000000 |
| construction or utilities      | 15    | AscoreR  | HADS Anxiety score    | 15 | 7.5333333  | 3.2263794 | 1.0000000 | 7.0000000  | 12.0000000 | 1.0000000 | 12.0000000 |
|                                |       | DscoreR  | HADS Depression score | 15 | 4.8666667  | 2.4162151 | 1.0000000 | 4.0000000  | 9.0000000  | 1.0000000 | 9.0000000  |
| education                      | 9     | AscoreR  | HADS Anxiety score    | 9  | 8.5555556  | 2.8771128 | 4.0000000 | 9.0000000  | 13.0000000 | 4.0000000 | 13.0000000 |
|                                |       | DscoreR  | HADS Depression score | 9  | 4.8888889  | 3.1001792 | 0         | 4.0000000  | 10.0000000 | 0         | 10.0000000 |

## The MEANS Procedure

Gender=Male

| Industry                                                    | N Obs | Variable           | Label         | N  | Mean       | Std Dev   | 5th Pctl  | 50th Pctl  | 95th Pctl  | Minimum   | Maximum    |
|-------------------------------------------------------------|-------|--------------------|---------------|----|------------|-----------|-----------|------------|------------|-----------|------------|
| finance or insurance                                        | 12    | AscoreR<br>DscoreR | HADS          | 12 | 6.8333333  | 3.7132033 | 1.0000000 | 6.0000000  | 13.0000000 | 1.0000000 | 13.0000000 |
|                                                             |       |                    | Anxiety score | 12 | 4.0000000  | 2.7961012 | 1.0000000 | 3.0000000  | 9.0000000  | 1.0000000 | 9.0000000  |
| government                                                  | 12    | AscoreR<br>DscoreR | HADS          | 12 | 5.2500000  | 4.0704032 | 0         | 5.0000000  | 13.0000000 | 0         | 13.0000000 |
|                                                             |       |                    | Anxiety score | 12 | 3.7500000  | 3.4673805 | 0         | 2.5000000  | 10.0000000 | 0         | 10.0000000 |
| healthcare                                                  | 30    | AscoreR<br>DscoreR | HADS          | 30 | 10.1333333 | 4.5541443 | 4.0000000 | 9.0000000  | 18.0000000 | 3.0000000 | 20.0000000 |
|                                                             |       |                    | Anxiety score | 30 | 5.8333333  | 3.9047569 | 1.0000000 | 6.0000000  | 14.0000000 | 1.0000000 | 17.0000000 |
| higher education                                            | 36    | AscoreR<br>DscoreR | HADS          | 36 | 7.9722222  | 3.8580981 | 1.0000000 | 8.0000000  | 14.0000000 | 0         | 18.0000000 |
|                                                             |       |                    | Anxiety score | 36 | 5.1666667  | 3.1396087 | 1.0000000 | 5.0000000  | 12.0000000 | 1.0000000 | 13.0000000 |
| legal services                                              | 8     | AscoreR<br>DscoreR | HADS          | 8  | 10.2500000 | 4.3670847 | 5.0000000 | 10.0000000 | 19.0000000 | 5.0000000 | 19.0000000 |
|                                                             |       |                    | Anxiety score | 8  | 6.1250000  | 3.3990545 | 2.0000000 | 5.5000000  | 13.0000000 | 2.0000000 | 13.0000000 |
| manufacturing                                               | 5     | AscoreR<br>DscoreR | HADS          | 5  | 5.4000000  | 4.4497191 | 0         | 4.0000000  | 12.0000000 | 0         | 12.0000000 |
|                                                             |       |                    | Anxiety score | 5  | 4.2000000  | 4.4944410 | 1.0000000 | 2.0000000  | 12.0000000 | 1.0000000 | 12.0000000 |
| missing                                                     | 10    | AscoreR<br>DscoreR | HADS          | 10 | 6.8000000  | 3.4576807 | 2.0000000 | 7.0000000  | 14.0000000 | 2.0000000 | 14.0000000 |
|                                                             |       |                    | Anxiety score | 10 | 4.9000000  | 1.6633300 | 3.0000000 | 4.5000000  | 8.0000000  | 3.0000000 | 8.0000000  |
| personal services or<br>repair or other support<br>services | 3     | AscoreR<br>DscoreR | HADS          | 3  | 9.3333333  | 6.8068593 | 4.0000000 | 7.0000000  | 17.0000000 | 4.0000000 | 17.0000000 |
|                                                             |       |                    | Anxiety score | 3  | 3.6666667  | 3.2145503 | 0         | 5.0000000  | 6.0000000  | 0         | 6.0000000  |
| pharmaceutical                                              | 8     | AscoreR<br>DscoreR | HADS          | 8  | 8.7500000  | 4.8916839 | 1.0000000 | 9.5000000  | 16.0000000 | 1.0000000 | 16.0000000 |
|                                                             |       |                    | Anxiety score | 8  | 5.0000000  | 3.0237158 | 0         | 5.0000000  | 9.0000000  | 0         | 9.0000000  |

## The MEANS Procedure

Gender=Male

| Industry                                                       | N Obs | Variable           | Label                                       | N        | Mean                    | Std Dev                | 5th Pctl               | 50th Pctl               | 95th Pctl                | Minimum                | Maximum                  |
|----------------------------------------------------------------|-------|--------------------|---------------------------------------------|----------|-------------------------|------------------------|------------------------|-------------------------|--------------------------|------------------------|--------------------------|
| professional or scientific or engineering or computer services | 26    | AscoreR<br>DscoreR | HADS Anxiety score<br>HADS Depression score | 26<br>26 | 8.1538462<br>5.0769231  | 3.4950514<br>2.5443754 | 4.0000000<br>1.0000000 | 8.0000000<br>5.0000000  | 14.0000000<br>9.0000000  | 2.0000000<br>0         | 15.0000000<br>10.0000000 |
| publishing or media or other information services              | 5     | AscoreR<br>DscoreR | HADS Anxiety score<br>HADS Depression score | 5<br>5   | 11.4000000<br>9.6000000 | 2.7018512<br>6.1886994 | 8.0000000<br>3.0000000 | 13.0000000<br>7.0000000 | 14.0000000<br>18.0000000 | 8.0000000<br>3.0000000 | 14.0000000<br>18.0000000 |
| real estate                                                    | 3     | AscoreR<br>DscoreR | HADS Anxiety score<br>HADS Depression score | 3<br>3   | 11.0000000<br>9.3333333 | 2.6457513<br>5.5075705 | 8.0000000<br>4.0000000 | 12.0000000<br>9.0000000 | 13.0000000<br>15.0000000 | 8.0000000<br>4.0000000 | 13.0000000<br>15.0000000 |
| religious or grantmaking or civic or labor organizations       | 7     | AscoreR<br>DscoreR | HADS Anxiety score<br>HADS Depression score | 7<br>7   | 7.5714286<br>5.2857143  | 3.1014590<br>3.1997024 | 2.0000000<br>2.0000000 | 9.0000000<br>4.0000000  | 11.0000000<br>12.0000000 | 2.0000000<br>2.0000000 | 11.0000000<br>12.0000000 |
| retail                                                         | 11    | AscoreR<br>DscoreR | HADS Anxiety score<br>HADS Depression score | 11<br>11 | 9.0000000<br>4.9090909  | 5.7445626<br>3.3303017 | 1.0000000<br>1.0000000 | 8.0000000<br>5.0000000  | 17.0000000<br>12.0000000 | 1.0000000<br>1.0000000 | 17.0000000<br>12.0000000 |
| social services                                                | 8     | AscoreR<br>DscoreR | HADS Anxiety score<br>HADS Depression score | 8<br>8   | 11.0000000<br>6.5000000 | 4.6291005<br>3.7416574 | 4.0000000<br>0         | 11.0000000<br>6.5000000 | 17.0000000<br>11.0000000 | 4.0000000<br>0         | 17.0000000<br>11.0000000 |
| telecommunications                                             | 2     | AscoreR<br>DscoreR | HADS Anxiety score<br>HADS Depression score | 2<br>2   | 5.5000000<br>3.5000000  | 2.1213203<br>0.7071068 | 4.0000000<br>3.0000000 | 5.5000000<br>3.5000000  | 7.0000000<br>4.0000000   | 4.0000000<br>3.0000000 | 7.0000000<br>4.0000000   |
| transportation                                                 | 4     | AscoreR<br>DscoreR | HADS Anxiety score<br>HADS Depression score | 4<br>4   | 6.7500000<br>4.7500000  | 3.7749172<br>2.5000000 | 4.0000000<br>2.0000000 | 5.5000000<br>4.5000000  | 12.0000000<br>8.0000000  | 4.0000000<br>2.0000000 | 12.0000000<br>8.0000000  |
| wholesale                                                      | 2     | AscoreR<br>DscoreR | HADS Anxiety score<br>HADS Depression score | 2<br>2   | 8.0000000<br>6.5000000  | 8.4852814<br>0.7071068 | 2.0000000<br>6.0000000 | 8.0000000<br>6.5000000  | 14.0000000<br>7.0000000  | 2.0000000<br>6.0000000 | 14.0000000<br>7.0000000  |

## The MEANS Procedure

Gender=Female

| Work arrangement changed by Stay at home order March 23 | N Obs | Variable           | Label                                       | N          | Mean                    | Std Dev                | 5th Pctl                | 50th Pctl               | 95th Pctl                | Minimum                 | Maximum                  |
|---------------------------------------------------------|-------|--------------------|---------------------------------------------|------------|-------------------------|------------------------|-------------------------|-------------------------|--------------------------|-------------------------|--------------------------|
| no                                                      | 173   | AscoreR<br>DscoreR | HADS Anxiety score<br>HADS Depression score | 173<br>173 | 9.8612717<br>6.6242775  | 4.3779777<br>3.9580489 | 2.0000000<br>1.0000000  | 10.0000000<br>7.0000000 | 18.0000000<br>14.0000000 | 0<br>0                  | 21.0000000<br>20.0000000 |
| yes                                                     | 489   | AscoreR<br>DscoreR | HADS Anxiety score<br>HADS Depression score | 489<br>489 | 10.1308793<br>6.4335378 | 4.0477741<br>3.5770472 | 4.0000000<br>1.0000000  | 10.0000000<br>6.0000000 | 17.0000000<br>13.0000000 | 0<br>0                  | 20.0000000<br>19.0000000 |
| missing                                                 | 1     | AscoreR<br>DscoreR | HADS Anxiety score<br>HADS Depression score | 1<br>1     | 12.0000000<br>6.0000000 | .<br>.                 | 12.0000000<br>6.0000000 | 12.0000000<br>6.0000000 | 12.0000000<br>6.0000000  | 12.0000000<br>6.0000000 | 12.0000000<br>6.0000000  |

Gender=Male

| Work arrangement changed by Stay at home order March 23 | N Obs | Variable           | Label                                       | N          | Mean                   | Std Dev                | 5th Pctl               | 50th Pctl              | 95th Pctl                | Minimum | Maximum                  |
|---------------------------------------------------------|-------|--------------------|---------------------------------------------|------------|------------------------|------------------------|------------------------|------------------------|--------------------------|---------|--------------------------|
| no                                                      | 79    | AscoreR<br>DscoreR | HADS Anxiety score<br>HADS Depression score | 79<br>79   | 7.8227848<br>5.1139241 | 4.3345940<br>3.2105090 | 1.0000000<br>1.0000000 | 7.0000000<br>5.0000000 | 17.0000000<br>12.0000000 | 0<br>0  | 20.0000000<br>13.0000000 |
| yes                                                     | 155   | AscoreR<br>DscoreR | HADS Anxiety score<br>HADS Depression score | 155<br>155 | 8.7935484<br>5.6193548 | 4.0559348<br>3.6096389 | 2.0000000<br>1.0000000 | 9.0000000<br>5.0000000 | 16.0000000<br>13.0000000 | 0<br>0  | 18.0000000<br>18.0000000 |

## The MEANS Procedure

Gender=Female

| Were unwell for two or more consecutive days (whether or not worked) | N Obs | Variable | Label                 | N   | Mean       | Std Dev   | 5th Pctl  | 50th Pctl  | 95th Pctl  | Minimum   | Maximum    |
|----------------------------------------------------------------------|-------|----------|-----------------------|-----|------------|-----------|-----------|------------|------------|-----------|------------|
| no                                                                   | 498   | AscoreR  | HADS Anxiety score    | 498 | 9.8755020  | 4.2403355 | 3.0000000 | 10.0000000 | 18.0000000 | 0         | 21.0000000 |
|                                                                      |       | DscoreR  | HADS Depression score | 498 | 6.3132530  | 3.7419619 | 1.0000000 | 6.0000000  | 13.0000000 | 0         | 20.0000000 |
| yes                                                                  | 164   | AscoreR  | HADS Anxiety score    | 164 | 10.6585366 | 3.7374560 | 5.0000000 | 10.0000000 | 16.0000000 | 0         | 20.0000000 |
|                                                                      |       | DscoreR  | HADS Depression score | 164 | 7.0000000  | 3.4374338 | 2.0000000 | 7.0000000  | 14.0000000 | 0         | 19.0000000 |
| missing                                                              | 1     | AscoreR  | HADS Anxiety score    | 1   | 6.0000000  | .         | 6.0000000 | 6.0000000  | 6.0000000  | 6.0000000 | 6.0000000  |
|                                                                      |       | DscoreR  | HADS Depression score | 1   | 6.0000000  | .         | 6.0000000 | 6.0000000  | 6.0000000  | 6.0000000 | 6.0000000  |

Gender=Male

| Were unwell for two or more consecutive days (whether or not worked) | N Obs | Variable | Label                 | N   | Mean      | Std Dev   | 5th Pctl  | 50th Pctl | 95th Pctl  | Minimum   | Maximum    |
|----------------------------------------------------------------------|-------|----------|-----------------------|-----|-----------|-----------|-----------|-----------|------------|-----------|------------|
| no                                                                   | 188   | AscoreR  | HADS Anxiety score    | 188 | 8.1968085 | 4.3174302 | 1.0000000 | 8.0000000 | 16.0000000 | 0         | 20.0000000 |
|                                                                      |       | DscoreR  | HADS Depression score | 188 | 5.2446809 | 3.4754638 | 1.0000000 | 5.0000000 | 12.0000000 | 0         | 18.0000000 |
| yes                                                                  | 45    | AscoreR  | HADS Anxiety score    | 45  | 9.6666667 | 3.2752516 | 6.0000000 | 9.0000000 | 17.0000000 | 5.0000000 | 18.0000000 |
|                                                                      |       | DscoreR  | HADS Depression score | 45  | 6.3777778 | 3.3931005 | 2.0000000 | 6.0000000 | 12.0000000 | 1.0000000 | 18.0000000 |
| missing                                                              | 1     | AscoreR  | HADS Anxiety score    | 1   | 5.0000000 | .         | 5.0000000 | 5.0000000 | 5.0000000  | 5.0000000 | 5.0000000  |
|                                                                      |       | DscoreR  | HADS Depression score | 1   | 2.0000000 | .         | 2.0000000 | 2.0000000 | 2.0000000  | 2.0000000 | 2.0000000  |

## The MEANS Procedure

Gender=Female

| Believe may have been infected | N Obs | Variable | Label                 | N   | Mean       | Std Dev   | 5th Pctl  | 50th Pctl  | 95th Pctl  | Minimum | Maximum    |
|--------------------------------|-------|----------|-----------------------|-----|------------|-----------|-----------|------------|------------|---------|------------|
| no                             | 475   | AscoreR  | HADS Anxiety score    | 475 | 9.8821053  | 4.1316413 | 3.0000000 | 10.0000000 | 16.0000000 | 0       | 21.0000000 |
|                                |       | DscoreR  | HADS Depression score | 475 | 6.2926316  | 3.6711684 | 1.0000000 | 6.0000000  | 13.0000000 | 0       | 20.0000000 |
| yes                            | 59    | AscoreR  | HADS Anxiety score    | 59  | 11.1525424 | 4.5893939 | 4.0000000 | 11.0000000 | 19.0000000 | 0       | 20.0000000 |
|                                |       | DscoreR  | HADS Depression score | 59  | 7.3898305  | 3.8011657 | 1.0000000 | 7.0000000  | 14.0000000 | 0       | 16.0000000 |
| missing                        | 129   | AscoreR  | HADS Anxiety score    | 129 | 10.2325581 | 3.8558228 | 5.0000000 | 10.0000000 | 16.0000000 | 0       | 20.0000000 |
|                                |       | DscoreR  | HADS Depression score | 129 | 6.7674419  | 3.5805718 | 1.0000000 | 7.0000000  | 14.0000000 | 0       | 18.0000000 |

Gender=Male

| Believe may have been infected | N Obs | Variable | Label                 | N   | Mean      | Std Dev   | 5th Pctl  | 50th Pctl  | 95th Pctl  | Minimum   | Maximum    |
|--------------------------------|-------|----------|-----------------------|-----|-----------|-----------|-----------|------------|------------|-----------|------------|
| no                             | 175   | AscoreR  | HADS Anxiety score    | 175 | 8.0685714 | 4.1420032 | 2.0000000 | 8.0000000  | 16.0000000 | 0         | 20.0000000 |
|                                |       | DscoreR  | HADS Depression score | 175 | 5.3257143 | 3.5738790 | 1.0000000 | 5.0000000  | 12.0000000 | 0         | 18.0000000 |
| yes                            | 20    | AscoreR  | HADS Anxiety score    | 20  | 9.1500000 | 4.8587956 | 2.0000000 | 8.0000000  | 17.0000000 | 1.0000000 | 17.0000000 |
|                                |       | DscoreR  | HADS Depression score | 20  | 5.2000000 | 2.6675437 | 1.0000000 | 4.5000000  | 9.0000000  | 0         | 9.0000000  |
| missing                        | 39    | AscoreR  | HADS Anxiety score    | 39  | 9.8974359 | 3.6186278 | 4.0000000 | 10.0000000 | 17.0000000 | 1.0000000 | 18.0000000 |
|                                |       | DscoreR  | HADS Depression score | 39  | 6.1282051 | 3.4195990 | 1.0000000 | 5.0000000  | 12.0000000 | 1.0000000 | 14.0000000 |

## The MEANS Procedure

Gender=Female

| Self-rated health compared to others | N Obs | Variable           | Label                                       | N   | Mean       | Std Dev   | 5th Pctl  | 50th Pctl  | 95th Pctl  | Minimum   | Maximum    |
|--------------------------------------|-------|--------------------|---------------------------------------------|-----|------------|-----------|-----------|------------|------------|-----------|------------|
| good to excellent                    | 594   | AscoreR<br>DscoreR | HADS Anxiety score<br>HADS Depression score | 594 | 9.8552189  | 4.1129805 | 3.0000000 | 10.0000000 | 17.0000000 | 0         | 21.0000000 |
|                                      |       |                    |                                             | 594 | 6.2777778  | 3.6256456 | 1.0000000 | 6.0000000  | 12.0000000 | 0         | 20.0000000 |
| poor or fair                         | 69    | AscoreR<br>DscoreR | HADS Anxiety score<br>HADS Depression score | 69  | 11.8550725 | 3.8854001 | 7.0000000 | 12.0000000 | 19.0000000 | 5.0000000 | 20.0000000 |
|                                      |       |                    |                                             | 69  | 8.2463768  | 3.6558004 | 2.0000000 | 8.0000000  | 14.0000000 | 1.0000000 | 16.0000000 |

Gender=Male

| Self-rated health compared to others | N Obs | Variable           | Label                                       | N   | Mean       | Std Dev   | 5th Pctl  | 50th Pctl  | 95th Pctl  | Minimum   | Maximum    |
|--------------------------------------|-------|--------------------|---------------------------------------------|-----|------------|-----------|-----------|------------|------------|-----------|------------|
| good to excellent                    | 211   | AscoreR<br>DscoreR | HADS Anxiety score<br>HADS Depression score | 211 | 8.2843602  | 4.1969027 | 2.0000000 | 8.0000000  | 16.0000000 | 0         | 20.0000000 |
|                                      |       |                    |                                             | 211 | 5.1658768  | 3.1631768 | 1.0000000 | 5.0000000  | 11.0000000 | 0         | 18.0000000 |
| poor or fair                         | 23    | AscoreR<br>DscoreR | HADS Anxiety score<br>HADS Depression score | 23  | 10.1304348 | 3.5586559 | 4.0000000 | 10.0000000 | 16.0000000 | 4.0000000 | 17.0000000 |
|                                      |       |                    |                                             | 23  | 8.0434783  | 5.0043459 | 1.0000000 | 6.0000000  | 17.0000000 | 0         | 18.0000000 |

## The MEANS Procedure

Gender=Female

| Self-rated health | N Obs | Variable           | Label                 | N   | Mean       | Std Dev   | 5th Pctl  | 50th Pctl  | 95th Pctl  | Minimum   | Maximum    |
|-------------------|-------|--------------------|-----------------------|-----|------------|-----------|-----------|------------|------------|-----------|------------|
| good to excellent | 633   | AscoreR<br>DscoreR | HADS Anxiety score    | 633 | 9.9921011  | 4.1121464 | 4.0000000 | 10.0000000 | 17.0000000 | 0         | 21.0000000 |
|                   |       |                    | HADS Depression score | 633 | 6.4312796  | 3.6507457 | 1.0000000 | 6.0000000  | 13.0000000 | 0         | 20.0000000 |
| poor or fair      | 30    | AscoreR<br>DscoreR | HADS Anxiety score    | 30  | 11.5666667 | 4.3445037 | 7.0000000 | 11.0000000 | 20.0000000 | 7.0000000 | 20.0000000 |
|                   |       |                    | HADS Depression score | 30  | 7.5666667  | 4.0826237 | 2.0000000 | 6.0000000  | 15.0000000 | 1.0000000 | 16.0000000 |

Gender=Male

| Self-rated health | N Obs | Variable           | Label                 | N   | Mean       | Std Dev   | 5th Pctl  | 50th Pctl  | 95th Pctl  | Minimum   | Maximum    |
|-------------------|-------|--------------------|-----------------------|-----|------------|-----------|-----------|------------|------------|-----------|------------|
| good to excellent | 228   | AscoreR<br>DscoreR | HADS Anxiety score    | 228 | 8.3991228  | 4.1378663 | 2.0000000 | 8.0000000  | 16.0000000 | 0         | 20.0000000 |
|                   |       |                    | HADS Depression score | 228 | 5.3026316  | 3.3013937 | 1.0000000 | 5.0000000  | 12.0000000 | 0         | 18.0000000 |
| poor or fair      | 6     | AscoreR<br>DscoreR | HADS Anxiety score    | 6   | 11.0000000 | 4.9396356 | 5.0000000 | 11.0000000 | 17.0000000 | 5.0000000 | 17.0000000 |
|                   |       |                    | HADS Depression score | 6   | 11.0000000 | 5.6568542 | 2.0000000 | 12.0000000 | 17.0000000 | 2.0000000 | 17.0000000 |



## The MEANS Procedure

Gender=Female

| Phase of restrictions | N Obs | Variable | Label                 | N   | Mean       | Std Dev   | 5th Pctl  | 50th Pctl  | 95th Pctl  | Minimum | Maximum    |
|-----------------------|-------|----------|-----------------------|-----|------------|-----------|-----------|------------|------------|---------|------------|
| red                   | 370   | AscoreR  | HADS Anxiety score    | 370 | 9.8621622  | 4.2195731 | 3.0000000 | 10.0000000 | 16.0000000 | 0       | 21.0000000 |
|                       |       | DscoreR  | HADS Depression score | 370 | 6.3081081  | 3.6234989 | 1.0000000 | 6.0000000  | 13.0000000 | 0       | 20.0000000 |
| yellow                | 293   | AscoreR  | HADS Anxiety score    | 293 | 10.3174061 | 4.0126005 | 4.0000000 | 10.0000000 | 18.0000000 | 0       | 20.0000000 |
|                       |       | DscoreR  | HADS Depression score | 293 | 6.7030717  | 3.7348632 | 1.0000000 | 7.0000000  | 13.0000000 | 0       | 18.0000000 |

Gender=Male

| Phase of restrictions | N Obs | Variable | Label                 | N   | Mean      | Std Dev   | 5th Pctl  | 50th Pctl | 95th Pctl  | Minimum | Maximum    |
|-----------------------|-------|----------|-----------------------|-----|-----------|-----------|-----------|-----------|------------|---------|------------|
| red                   | 146   | AscoreR  | HADS Anxiety score    | 146 | 8.2739726 | 3.9401042 | 2.0000000 | 8.0000000 | 14.0000000 | 0       | 19.0000000 |
|                       |       | DscoreR  | HADS Depression score | 146 | 5.2054795 | 3.3629171 | 1.0000000 | 5.0000000 | 12.0000000 | 0       | 18.0000000 |
| yellow                | 88    | AscoreR  | HADS Anxiety score    | 88  | 8.7840909 | 4.5269280 | 2.0000000 | 8.0000000 | 17.0000000 | 0       | 20.0000000 |
|                       |       | DscoreR  | HADS Depression score | 88  | 5.8522727 | 3.6531824 | 1.0000000 | 5.0000000 | 12.0000000 | 0       | 18.0000000 |

## Only those who reported change in work since first case

### The MEANS Procedure

Gender=Female

| Lost job | N Obs | Variable | Label                 | N   | Mean       | Std Dev   | 5th Pctl  | 50th Pctl  | 95th Pctl  | Minimum   | Maximum    |
|----------|-------|----------|-----------------------|-----|------------|-----------|-----------|------------|------------|-----------|------------|
| no       | 436   | AscoreR  | HADS Anxiety score    | 436 | 10.1055046 | 4.0032018 | 4.0000000 | 10.0000000 | 17.0000000 | 0         | 20.0000000 |
|          |       | DscoreR  | HADS Depression score | 436 | 6.3967890  | 3.5668833 | 1.0000000 | 6.0000000  | 12.0000000 | 0         | 19.0000000 |
| yes      | 53    | AscoreR  | HADS Anxiety score    | 53  | 10.3396226 | 4.4330203 | 3.0000000 | 10.0000000 | 18.0000000 | 3.0000000 | 20.0000000 |
|          |       | DscoreR  | HADS Depression score | 53  | 6.7358491  | 3.6802537 | 0         | 7.0000000  | 14.0000000 | 0         | 15.0000000 |

Gender=Male

| Lost job | N Obs | Variable | Label                 | N   | Mean       | Std Dev   | 5th Pctl  | 50th Pctl  | 95th Pctl  | Minimum   | Maximum    |
|----------|-------|----------|-----------------------|-----|------------|-----------|-----------|------------|------------|-----------|------------|
| no       | 141   | AscoreR  | HADS Anxiety score    | 141 | 8.5602837  | 3.9358586 | 2.0000000 | 9.0000000  | 15.0000000 | 0         | 18.0000000 |
|          |       | DscoreR  | HADS Depression score | 141 | 5.2978723  | 3.4116286 | 1.0000000 | 5.0000000  | 12.0000000 | 0         | 18.0000000 |
| yes      | 14    | AscoreR  | HADS Anxiety score    | 14  | 11.1428571 | 4.6385864 | 4.0000000 | 11.5000000 | 18.0000000 | 4.0000000 | 18.0000000 |
|          |       | DscoreR  | HADS Depression score | 14  | 8.8571429  | 4.0735005 | 4.0000000 | 8.0000000  | 18.0000000 | 4.0000000 | 18.0000000 |

## Only those who reported change in work since first case

## The MEANS Procedure

Gender=Female

| Applied for unemployment | N Obs | Variable           | Label                                                | N          | Mean                    | Std Dev                | 5th Pctl               | 50th Pctl               | 95th Pctl                | Minimum                | Maximum                  |
|--------------------------|-------|--------------------|------------------------------------------------------|------------|-------------------------|------------------------|------------------------|-------------------------|--------------------------|------------------------|--------------------------|
| no                       | 14    | AscoreR<br>DscoreR | HADS Anxiety<br>score<br>HADS<br>Depression<br>score | 14<br>14   | 10.8571429<br>7.9285714 | 5.4187302<br>3.4073289 | 3.0000000<br>3.0000000 | 10.0000000<br>7.0000000 | 20.0000000<br>15.0000000 | 3.0000000<br>3.0000000 | 20.0000000<br>15.0000000 |
| yes                      | 38    | AscoreR<br>DscoreR | HADS Anxiety<br>score<br>HADS<br>Depression<br>score | 38<br>38   | 10.2894737<br>6.2105263 | 4.0530795<br>3.7210714 | 4.0000000<br>0         | 10.0000000<br>6.0000000 | 18.0000000<br>14.0000000 | 3.0000000<br>0         | 19.0000000<br>15.0000000 |
| missing                  | 437   | AscoreR<br>DscoreR | HADS Anxiety<br>score<br>HADS<br>Depression<br>score | 437<br>437 | 10.0938215<br>6.4050343 | 4.0060600<br>3.5669575 | 4.0000000<br>1.0000000 | 10.0000000<br>6.0000000 | 17.0000000<br>12.0000000 | 0<br>0                 | 20.0000000<br>19.0000000 |

Gender=Male

| Applied for unemployment | N Obs | Variable           | Label                                                | N          | Mean                     | Std Dev                | 5th Pctl                | 50th Pctl                | 95th Pctl                | Minimum                 | Maximum                  |
|--------------------------|-------|--------------------|------------------------------------------------------|------------|--------------------------|------------------------|-------------------------|--------------------------|--------------------------|-------------------------|--------------------------|
| no                       | 4     | AscoreR<br>DscoreR | HADS Anxiety<br>score<br>HADS<br>Depression<br>score | 4<br>4     | 13.0000000<br>11.7500000 | 2.8284271<br>3.0956959 | 11.0000000<br>9.0000000 | 12.0000000<br>11.0000000 | 17.0000000<br>16.0000000 | 11.0000000<br>9.0000000 | 17.0000000<br>16.0000000 |
| yes                      | 10    | AscoreR<br>DscoreR | HADS Anxiety<br>score<br>HADS<br>Depression<br>score | 10<br>10   | 10.4000000<br>7.7000000  | 5.1251016<br>3.9454615 | 4.0000000<br>4.0000000  | 11.5000000<br>6.5000000  | 18.0000000<br>18.0000000 | 4.0000000<br>4.0000000  | 18.0000000<br>18.0000000 |
| missing                  | 141   | AscoreR<br>DscoreR | HADS Anxiety<br>score<br>HADS<br>Depression<br>score | 141<br>141 | 8.5602837<br>5.2978723   | 3.9358586<br>3.4116286 | 2.0000000<br>1.0000000  | 9.0000000<br>5.0000000   | 15.0000000<br>12.0000000 | 0<br>0                  | 18.0000000<br>18.0000000 |

## Only those who reported change in work since first case

## The MEANS Procedure

Gender=Female

| hrschange      | N<br>Obs | Variable           | Label                 | N   | Mean       | Std Dev   | 5th Pctl   | 50th Pctl  | 95th Pctl  | Minimum    | Maximum    |
|----------------|----------|--------------------|-----------------------|-----|------------|-----------|------------|------------|------------|------------|------------|
| about the same | 214      | AscoreR<br>DscoreR | HADS Anxiety score    | 214 | 9.9906542  | 3.7840667 | 4.0000000  | 10.0000000 | 18.0000000 | 0          | 18.0000000 |
|                |          |                    | HADS Depression score | 214 | 6.0841121  | 3.5830102 | 1.0000000  | 6.0000000  | 12.0000000 | 0          | 19.0000000 |
| more           | 83       | AscoreR<br>DscoreR | HADS Anxiety score    | 83  | 11.1807229 | 4.1530024 | 5.0000000  | 12.0000000 | 16.0000000 | 0          | 20.0000000 |
|                |          |                    | HADS Depression score | 83  | 6.8192771  | 3.2578033 | 2.0000000  | 7.0000000  | 12.0000000 | 1.0000000  | 18.0000000 |
| less           | 138      | AscoreR<br>DscoreR | HADS Anxiety score    | 138 | 9.6231884  | 4.1613496 | 3.0000000  | 9.5000000  | 17.0000000 | 0          | 20.0000000 |
|                |          |                    | HADS Depression score | 138 | 6.6449275  | 3.7040139 | 1.0000000  | 6.0000000  | 13.0000000 | 0          | 18.0000000 |
| missing        | 1        | AscoreR<br>DscoreR | HADS Anxiety score    | 1   | 12.0000000 | .         | 12.0000000 | 12.0000000 | 12.0000000 | 12.0000000 | 12.0000000 |
|                |          |                    | HADS Depression score | 1   | 4.0000000  | .         | 4.0000000  | 4.0000000  | 4.0000000  | 4.0000000  | 4.0000000  |
| lost work      | 53       | AscoreR<br>DscoreR | HADS Anxiety score    | 53  | 10.3396226 | 4.4330203 | 3.0000000  | 10.0000000 | 18.0000000 | 3.0000000  | 20.0000000 |
|                |          |                    | HADS Depression score | 53  | 6.7358491  | 3.6802537 | 0          | 7.0000000  | 14.0000000 | 0          | 15.0000000 |

Gender=Male

| hrschange      | N<br>Obs | Variable           | Label                 | N  | Mean       | Std Dev   | 5th Pctl  | 50th Pctl  | 95th Pctl  | Minimum   | Maximum    |
|----------------|----------|--------------------|-----------------------|----|------------|-----------|-----------|------------|------------|-----------|------------|
| about the same | 69       | AscoreR<br>DscoreR | HADS Anxiety score    | 69 | 8.3043478  | 3.8551125 | 1.0000000 | 8.0000000  | 14.0000000 | 0         | 16.0000000 |
|                |          |                    | HADS Depression score | 69 | 4.7971014  | 3.1369698 | 1.0000000 | 4.0000000  | 10.0000000 | 0         | 17.0000000 |
| more           | 30       | AscoreR<br>DscoreR | HADS Anxiety score    | 30 | 9.3666667  | 4.2384393 | 2.0000000 | 9.0000000  | 17.0000000 | 2.0000000 | 18.0000000 |
|                |          |                    | HADS Depression score | 30 | 5.3333333  | 2.6695387 | 1.0000000 | 5.0000000  | 9.0000000  | 1.0000000 | 14.0000000 |
| less           | 42       | AscoreR<br>DscoreR | HADS Anxiety score    | 42 | 8.4047619  | 3.8639012 | 2.0000000 | 8.0000000  | 15.0000000 | 1.0000000 | 16.0000000 |
|                |          |                    | HADS Depression score | 42 | 6.0952381  | 4.1602622 | 1.0000000 | 5.5000000  | 13.0000000 | 0         | 18.0000000 |
| lost work      | 14       | AscoreR<br>DscoreR | HADS Anxiety score    | 14 | 11.1428571 | 4.6385864 | 4.0000000 | 11.5000000 | 18.0000000 | 4.0000000 | 18.0000000 |
|                |          |                    | HADS Depression score | 14 | 8.8571429  | 4.0735005 | 4.0000000 | 8.0000000  | 18.0000000 | 4.0000000 | 18.0000000 |

## Only those who reported change in work since first case

### The MEANS Procedure

Gender=Female

| Start or substantially increase telecommuting | N Obs | Variable | Label                 | N   | Mean       | Std Dev   | 5th Pctl  | 50th Pctl  | 95th Pctl  | Minimum   | Maximum    |
|-----------------------------------------------|-------|----------|-----------------------|-----|------------|-----------|-----------|------------|------------|-----------|------------|
| no                                            | 55    | AscoreR  | HADS Anxiety score    | 55  | 10.4727273 | 4.4715336 | 3.0000000 | 10.0000000 | 19.0000000 | 1.0000000 | 19.0000000 |
|                                               |       | DscoreR  | HADS Depression score | 55  | 6.6545455  | 3.7918928 | 1.0000000 | 6.0000000  | 14.0000000 | 0         | 18.0000000 |
| yes                                           | 342   | AscoreR  | HADS Anxiety score    | 342 | 10.0321637 | 3.9007655 | 4.0000000 | 10.0000000 | 16.0000000 | 0         | 20.0000000 |
|                                               |       | DscoreR  | HADS Depression score | 342 | 6.4269006  | 3.5035267 | 1.0000000 | 6.0000000  | 12.0000000 | 0         | 19.0000000 |
| missing                                       | 92    | AscoreR  | HADS Anxiety score    | 92  | 10.2934783 | 4.3413120 | 3.0000000 | 10.0000000 | 18.0000000 | 0         | 20.0000000 |
|                                               |       | DscoreR  | HADS Depression score | 92  | 6.3260870  | 3.7478454 | 0         | 6.0000000  | 14.0000000 | 0         | 15.0000000 |

Gender=Male

| Start or substantially increase telecommuting | N Obs | Variable | Label                 | N   | Mean      | Std Dev   | 5th Pctl  | 50th Pctl | 95th Pctl  | Minimum   | Maximum    |
|-----------------------------------------------|-------|----------|-----------------------|-----|-----------|-----------|-----------|-----------|------------|-----------|------------|
| no                                            | 18    | AscoreR  | HADS Anxiety score    | 18  | 9.1111111 | 3.4622143 | 2.0000000 | 9.5000000 | 16.0000000 | 2.0000000 | 16.0000000 |
|                                               |       | DscoreR  | HADS Depression score | 18  | 5.9444444 | 3.7333508 | 2.0000000 | 5.0000000 | 18.0000000 | 2.0000000 | 18.0000000 |
| yes                                           | 105   | AscoreR  | HADS Anxiety score    | 105 | 8.7714286 | 3.8586993 | 2.0000000 | 9.0000000 | 15.0000000 | 1.0000000 | 18.0000000 |
|                                               |       | DscoreR  | HADS Depression score | 105 | 4.9904762 | 3.1240237 | 1.0000000 | 4.0000000 | 12.0000000 | 0         | 14.0000000 |
| missing                                       | 32    | AscoreR  | HADS Anxiety score    | 32  | 8.6875000 | 5.0124844 | 0         | 9.0000000 | 17.0000000 | 0         | 18.0000000 |
|                                               |       | DscoreR  | HADS Depression score | 32  | 7.5000000 | 4.3920750 | 0         | 6.0000000 | 17.0000000 | 0         | 18.0000000 |

## Only those who reported change in work since first case

### The MEANS Procedure

Gender=Female

| Concerned about return to work | N Obs | Variable | Label                 | N   | Mean       | Std Dev   | 5th Pctl  | 50th Pctl  | 95th Pctl  | Minimum | Maximum    |
|--------------------------------|-------|----------|-----------------------|-----|------------|-----------|-----------|------------|------------|---------|------------|
| no                             | 153   | AscoreR  | HADS Anxiety score    | 153 | 9.1307190  | 4.0679958 | 1.0000000 | 9.0000000  | 16.0000000 | 0       | 20.0000000 |
|                                |       | DscoreR  | HADS Depression score | 153 | 5.8300654  | 3.4465674 | 1.0000000 | 5.0000000  | 12.0000000 | 0       | 19.0000000 |
| yes                            | 336   | AscoreR  | HADS Anxiety score    | 336 | 10.5863095 | 3.9615680 | 5.0000000 | 11.0000000 | 18.0000000 | 0       | 20.0000000 |
|                                |       | DscoreR  | HADS Depression score | 336 | 6.7083333  | 3.6065515 | 1.0000000 | 7.0000000  | 13.0000000 | 0       | 18.0000000 |

Gender=Male

| Concerned about return to work | N Obs | Variable | Label                 | N  | Mean      | Std Dev   | 5th Pctl  | 50th Pctl  | 95th Pctl  | Minimum   | Maximum    |
|--------------------------------|-------|----------|-----------------------|----|-----------|-----------|-----------|------------|------------|-----------|------------|
| no                             | 67    | AscoreR  | HADS Anxiety score    | 67 | 7.5820896 | 4.2503093 | 1.0000000 | 7.0000000  | 16.0000000 | 0         | 17.0000000 |
|                                |       | DscoreR  | HADS Depression score | 67 | 4.8059701 | 3.5085990 | 1.0000000 | 4.0000000  | 10.0000000 | 0         | 18.0000000 |
| yes                            | 88    | AscoreR  | HADS Anxiety score    | 88 | 9.7159091 | 3.6638930 | 4.0000000 | 10.0000000 | 16.0000000 | 1.0000000 | 18.0000000 |
|                                |       | DscoreR  | HADS Depression score | 88 | 6.2386364 | 3.5815437 | 2.0000000 | 6.0000000  | 14.0000000 | 0         | 18.0000000 |

## The MEANS Procedure

Gender=Female

| struggle with balancing work and childcare | N Obs | Variable | Label                 | N  | Mean       | Std Dev   | 5th Pctl  | 50th Pctl  | 95th Pctl  | Minimum   | Maximum    |
|--------------------------------------------|-------|----------|-----------------------|----|------------|-----------|-----------|------------|------------|-----------|------------|
| no                                         | 55    | AscoreR  | HADS Anxiety score    | 55 | 9.8000000  | 3.8412961 | 4.0000000 | 10.0000000 | 18.0000000 | 0         | 19.0000000 |
|                                            |       | DscoreR  | HADS Depression score | 55 | 6.1454545  | 3.7683781 | 1.0000000 | 6.0000000  | 12.0000000 | 1.0000000 | 18.0000000 |
| yes                                        | 53    | AscoreR  | HADS Anxiety score    | 53 | 10.0943396 | 3.9771663 | 5.0000000 | 10.0000000 | 18.0000000 | 1.0000000 | 20.0000000 |
|                                            |       | DscoreR  | HADS Depression score | 53 | 6.5660377  | 2.8923602 | 2.0000000 | 6.0000000  | 12.0000000 | 2.0000000 | 14.0000000 |
| missing                                    | 19    | AscoreR  | HADS Anxiety score    | 19 | 9.8421053  | 3.7603658 | 3.0000000 | 10.0000000 | 18.0000000 | 3.0000000 | 18.0000000 |
|                                            |       | DscoreR  | HADS Depression score | 19 | 5.8421053  | 3.3708416 | 2.0000000 | 5.0000000  | 14.0000000 | 2.0000000 | 14.0000000 |

Gender=Male

| struggle with balancing work and childcare | N Obs | Variable | Label                 | N  | Mean       | Std Dev   | 5th Pctl  | 50th Pctl  | 95th Pctl  | Minimum   | Maximum    |
|--------------------------------------------|-------|----------|-----------------------|----|------------|-----------|-----------|------------|------------|-----------|------------|
| no                                         | 25    | AscoreR  | HADS Anxiety score    | 25 | 8.2000000  | 3.3541020 | 3.0000000 | 8.0000000  | 14.0000000 | 2.0000000 | 14.0000000 |
|                                            |       | DscoreR  | HADS Depression score | 25 | 4.7600000  | 3.0177254 | 1.0000000 | 4.0000000  | 10.0000000 | 1.0000000 | 14.0000000 |
| yes                                        | 16    | AscoreR  | HADS Anxiety score    | 16 | 10.1875000 | 3.6003472 | 4.0000000 | 11.0000000 | 16.0000000 | 4.0000000 | 16.0000000 |
|                                            |       | DscoreR  | HADS Depression score | 16 | 6.3125000  | 3.6095937 | 1.0000000 | 5.5000000  | 14.0000000 | 1.0000000 | 14.0000000 |
| missing                                    | 8     | AscoreR  | HADS Anxiety score    | 8  | 8.3750000  | 5.9506902 | 0         | 9.0000000  | 17.0000000 | 0         | 17.0000000 |
|                                            |       | DscoreR  | HADS Depression score | 8  | 6.6250000  | 3.2043497 | 0         | 7.0000000  | 10.0000000 | 0         | 10.0000000 |
