# Supplementary material for: Symptoms of anxiety and depression in relation to work patterns during the first wave of the COVID-19 epidemic in Philadelphia PA: a cross-sectional survey
Source: bioRxiv or medRxiv preprint supplement (doi:10.1101/2021.01.21.21250117), 2021-01-22
Supplement: Supplementary file [file media-3.pdf]

**Supplemental Material 3: Principal Components Analysis of "worries" and HADS score for anxiety.  
Eigenvectors**

| <b>Prinipal component number</b>                 | Women       |              |              | Men         |             |              | All         |              |              |
|--------------------------------------------------|-------------|--------------|--------------|-------------|-------------|--------------|-------------|--------------|--------------|
|                                                  | <b>1</b>    | <b>2</b>     | <b>3</b>     | <b>1</b>    | <b>2</b>    | <b>3</b>     | <b>1</b>    | <b>2</b>     | <b>3</b>     |
| Proportion correlation explained                 | 0.39        | 0.13         | 0.1          | 0.41        | 0.14        | 0.1          | 0.4         | 0.13         | 0.11         |
| HADS Anxiety score                               | <b>0.29</b> | 0.04         | <b>0.47</b>  | <b>0.30</b> | 0.12        | <b>0.48</b>  | <b>0.30</b> | 0.06         | <b>0.43</b>  |
| I will be infected                               | <b>0.29</b> | <b>0.59</b>  | -0.11        | <b>0.29</b> | <b>0.55</b> | -0.28        | <b>0.29</b> | <b>0.58</b>  | -0.11        |
| I will infect my family                          | <b>0.24</b> | <b>0.68</b>  | -0.06        | <b>0.23</b> | <b>0.65</b> | 0.26         | <b>0.24</b> | <b>0.68</b>  | -0.01        |
| I will not be able to cope with the work         | <b>0.33</b> | 0.00         | <b>0.22</b>  | <b>0.39</b> | -0.04       | 0.01         | <b>0.35</b> | 0.00         | 0.19         |
| I will become poor                               | <b>0.39</b> | <b>-0.25</b> | <b>-0.24</b> | <b>0.38</b> | -0.19       | -0.19        | <b>0.38</b> | <b>-0.25</b> | <b>-0.26</b> |
| I will be short of food                          | <b>0.40</b> | <b>-0.27</b> | <b>-0.26</b> | <b>0.40</b> | -0.16       | <b>-0.31</b> | <b>0.40</b> | <b>-0.25</b> | <b>-0.28</b> |
| I will be short of medicines                     | <b>0.39</b> | -0.16        | <b>-0.32</b> | <b>0.39</b> | -0.09       | <b>-0.41</b> | <b>0.39</b> | -0.15        | <b>-0.35</b> |
| I will fail myself and my family                 | <b>0.39</b> | -0.12        | 0.01         | <b>0.34</b> | -0.19       | <b>0.50</b>  | <b>0.37</b> | -0.13        | 0.07         |
| I will be confined at home and not able to leave | <b>0.21</b> | -0.13        | <b>0.70</b>  | <b>0.25</b> | -0.39       | 0.26         | <b>0.23</b> | -0.19        | <b>0.70</b>  |
