# Supplementary material for: Symptoms of anxiety and depression in relation to work patterns during the first wave of the COVID-19 epidemic in Philadelphia PA: a cross-sectional survey
Source: bioRxiv or medRxiv preprint supplement (doi:10.1101/2021.01.21.21250117), 2021-01-22
Supplement: Supplementary file [file media-4.pdf]

**Supplemental Material 4: Occupation of employment during epidemic and rate of anxiety and depression, along with relative rate (RR) and 95% confidence intervals (CI) of the difference in continuous HADS scores relative to sample mean symptoms scores.**

| Occupation                                                       | Women |         |       |       |            |      |        |       |         | Men |       |            |      |       |   |      |      |      |
|------------------------------------------------------------------|-------|---------|-------|-------|------------|------|--------|-------|---------|-----|-------|------------|------|-------|---|------|------|------|
|                                                                  | Total | Anxiety |       |       | Depression |      |        | Total | Anxiety |     |       | Depression |      |       |   |      |      |      |
|                                                                  |       | N, %    | RR#   | 95%CI | N, %       | RR## | 95%CI  |       | N, %    | RR* | 95%CI | N, %       | RR*  | 95%CI |   |      |      |      |
| accountants, financial specialists, and other business operation | 33    | 12      | 0.92  | 0.80  | 1.07       | 2    | 0.95   | 0.78  | 1.16    | 13  | 2     | 0.81       | 0.61 | 1.06  | 0 | 0.78 | 0.55 | 1.10 |
| administrative support                                           | 81    | 35      | 0.95  | 0.86  | 1.04       | 10   | 0.92   | 0.81  | 1.05    | 15  | 6     | 1.01       | 0.79 | 1.29  | 0 | 1.02 | 0.75 | 1.39 |
| architects and engineers                                         | 10    | 4       | 0.93  | 0.72  | 1.19       | 2    | 1.13   | 0.81  | 1.57    | 15  | 4     | 0.90       | 0.70 | 1.16  | 1 | 0.88 | 0.64 | 1.20 |
| artists and performers                                           | 19    | 10      | 1.11  | 0.93  | 1.32       | 4    | 1.22   | 0.96  | 1.55    | 8   | 6     | 1.28       | 0.94 | 1.75  | 2 | 1.35 | 0.92 | 2.00 |
| computer occupations                                             | 17    | 10      | 1.04  | 0.86  | 1.26       | 2    | 0.89   | 0.68  | 1.16    | 14  | 4     | 0.86       | 0.66 | 1.12  | 0 | 0.77 | 0.55 | 1.09 |
| counselors, social workers, and community service occupations    | 32    | 11      | 0.98  | 0.85  | 1.13       | 3    | 0.96   | 0.79  | 1.17    | 6   | 3     | 1.23       | 0.86 | 1.75  | 1 | 0.89 | 0.55 | 1.44 |
| healthcare practitioners and technicians                         | 55    | 22      | 0.96  | 0.86  | 1.07       | 8    | 0.99   | 0.85  | 1.15    | 19  | 7     | 1.10       | 0.89 | 1.37  | 2 | 1.08 | 0.82 | 1.43 |
| lawyers and other legal occupations                              | 28    | 10      | 0.94  | 0.80  | 1.09       | 0    | 0.79## | 0.63  | 0.98    | 9   | 4     | 1.23       | 0.92 | 1.66  | 1 | 1.14 | 0.78 | 1.67 |
| librarians and curators                                          | 16    | 7       | 1.03  | 0.85  | 1.26       | 3    | 1.07   | 0.82  | 1.39    | 2   | 1     | 1.17       | 0.63 | 2.16  | 0 | 1.15 | 0.53 | 2.52 |
| life, physical, and social scientists                            | 57    | 21      | 0.96  | 0.86  | 1.07       | 4    | 0.85   | 0.73  | 1.00    | 21  | 8     | 1.18       | 0.96 | 1.45  | 1 | 1.03 | 0.79 | 1.35 |
| managers                                                         | 115   | 60      | 1.09# | 1.00  | 1.18       | 17   | 1.04   | 0.93  | 1.16    | 47  | 12    | 0.95       | 0.81 | 1.11  | 4 | 0.90 | 0.73 | 1.09 |
| media and communication                                          | 27    | 13      | 1.00  | 0.86  | 1.17       | 3    | 0.97   | 0.78  | 1.20    | 4   | 1     | 0.79       | 0.49 | 1.28  | 1 | 1.20 | 0.69 | 2.08 |
| other blue collar                                                | 33    | 15      | 1.02  | 0.88  | 1.17       | 6    | 1.11   | 0.92  | 1.34    | 19  | 7     | 0.98       | 0.79 | 1.23  | 1 | 0.98 | 0.74 | 1.30 |
| retail and other sales related occupations                       | 17    | 13      | 1.15  | 0.96  | 1.39       | 4    | 1.20   | 0.93  | 1.55    | 7   | 1     | 0.82       | 0.57 | 1.18  | 1 | 1.29 | 0.85 | 1.96 |
| teachers                                                         | 90    | 45      | 1.02  | 0.93  | 1.11       | 13   | 1.00   | 0.88  | 1.13    | 25  | 4     | 0.81       | 0.66 | 1.00  | 3 | 0.92 | 0.72 | 1.19 |
| missing                                                          | 33    | 10      | N/A   |       |            | 6    | N/A    |       |         | 10  | 3     | N/A        |      |       | 0 | N/A  |      |      |
|                                                                  |       | 30      |       |       |            | 18   |        |       |         |     | 30    |            |      |       | 0 |      |      |      |

\*none have p<0.05 after accounting for race, age, income, education, children living at home (not shown)

# after accounting for race, age, income, education, children living at home (not shown), evidence of association with managers increased to RR 1.10

## after accounting for race, age, income, education, children living at home (not shown), evidence of association with lawyers and other legal occupations weakened to RR 0.80 (0.64, 1.00)
